# Supplementary material
Source: publisher site journal article supplement (https://www.dovepress.com/article/568299)
Supplement: Supplementary file 1 [file %255Bmanuscript%20ID%255D%20Supplementary%20Files_Revision%201_v2.pdf]

## Supplementary File 1: Survey Announcement

# Breathlessness Action Plan Survey

*Does your breathlessness become suddenly worse in a way that's frightening?*

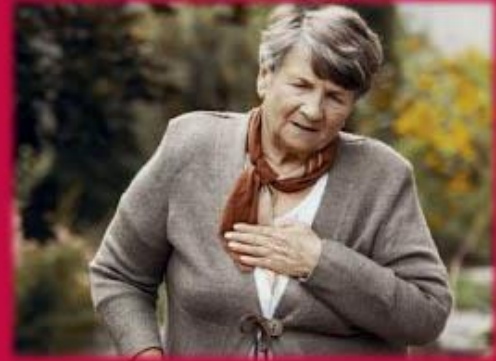

*Do you use a Breathlessness Action Plan to help you manage it?*

### Managing breathlessness

|                                                                                                                                                                                                                                                                                                                                                                                                                                                                                                                                                                                                             |                                                                                                                                                                                                                                                                                                                                                                                                                                                                                                                 |
|-------------------------------------------------------------------------------------------------------------------------------------------------------------------------------------------------------------------------------------------------------------------------------------------------------------------------------------------------------------------------------------------------------------------------------------------------------------------------------------------------------------------------------------------------------------------------------------------------------------|-----------------------------------------------------------------------------------------------------------------------------------------------------------------------------------------------------------------------------------------------------------------------------------------------------------------------------------------------------------------------------------------------------------------------------------------------------------------------------------------------------------------|
| <p>When feeling breathless</p> <ol style="list-style-type: none"><li> Stop what you are doing</li><li> Find a resting position</li><li> Use your fan or the breeze</li><li> Choose your preferred breathing technique, &amp; continue for 2-3 minutes</li></ol> | <p>After 2-3 minutes evaluate your breathlessness</p> <p>Are you feeling less breathless and more in control?</p> <p><b>Yes:</b> Continue with your activity</p> <p>OR</p> <p><b>No:</b> Take your prescribed reliever inhaler medication through a spacer, then resume breathing technique for another 2-3 minutes</p> <p> <b>If you remain breathless, refer to your written Action Plan on the front (turn over).</b></p> |
|-------------------------------------------------------------------------------------------------------------------------------------------------------------------------------------------------------------------------------------------------------------------------------------------------------------------------------------------------------------------------------------------------------------------------------------------------------------------------------------------------------------------------------------------------------------------------------------------------------------|-----------------------------------------------------------------------------------------------------------------------------------------------------------------------------------------------------------------------------------------------------------------------------------------------------------------------------------------------------------------------------------------------------------------------------------------------------------------------------------------------------------------|

The above example is an excerpt from <https://lungfoundation.com.au/resources/copd-action-plan/>

*Researchers are interested to hear about your experience of using a Breathlessness Action Plan*

*To find out more, please use the following QR code or call the project team on **phone number***

# Supplementary File 2: Questionnaires for Plan-Users and Clinicians

## For Plan-Users:

7/3/25, 2:10 PM

Qualtrics Survey Software

### Default Question Block

#### Breathlessness action plans - a questionnaire for people with COPD and their families (or other people providing support)

This is a questionnaire about the breathlessness action plan that people with COPD use to manage breathlessness that becomes suddenly worse in a way that's frightening. Please complete a separate questionnaire for each plan you have used.

If you would prefer to answer these questions via a telephone/Zoom interview, please contact the project team via [breathe@uts.edu.au](mailto:breathe@uts.edu.au) or 02 9514 4861.

You can find the [participant information sheet](#) here.

Please feel free to leave any questions blank that you would prefer not to answer.

Are you a person with COPD, a family member (or other person that provides support) or both together? *COPD is also known as emphysema, chronic bronchitis or chronic asthma.*

- Person with COPD
- Family member (or other person who provides support)
- Both of the above completing the survey together

What country do you live in?

- Australia
- New Zealand
- Other, please specify:

What postal code / ZIP code do you live in?

How often over the past year has breathlessness become suddenly worse in a way that was frightening?

Have you had to call an ambulance or go to the Emergency Department for any of these occasions?

- Yes
- No

What (if any) other kinds of help have you accessed either during or after these occasions? Tick all that apply.

- GP
- Practice nurse
- Respiratory service
- Palliative care service
- None
- Other, please specify:

How did you get the breathlessness action plan?

- Found it on the internet
- GP
- Respiratory service
- Palliative care service
- Pulmonary rehabilitation
- Made it myself/ourselves
- Other, please specify:

Have you received advice or support from a health professional to help you use the breathlessness action plan?

- Yes
- No
- If unsure, please specify:

Please describe your action plan, including anything you especially like about it. For example, is it easy to follow?

Please describe anything you DON'T like about the breathlessness action plan.

If you have made any changes to the action plan to make it more useful for yourself, please detail these changes below. For example, did you add something that was missing?

Of the times you've used the plan over the past year, how often did it help prevent the need to call an ambulance or go to Emergency?

- Never
- Sometimes
- Usually
- Always
- Comment (optional):

Please upload the breathlessness action plan by dragging a copy into the upload box below. If you only have a paper version, you can scan or take a photo of the plan and upload that.

If the plan is available via a website, please provide a link in the comments box below instead of uploading it. If you can't provide the plan or a link, please tell us the name/title and organisation in the comments box.

If possible, please remove any of your personal details that may be on the plan before uploading it. If you can't do this, we will remove these details when we receive it.

Add link or provide us the name/title and organisation here:

Please tell us anything else you think is relevant here:

Powered by Qualtrics

## For Clinicians:

7/3/25, 2:09 PM

Qualtrics Survey Software

### Questionnaire for health professionals

#### Breathlessness action plans - a questionnaire for health professionals

This is a questionnaire for health professionals about breathlessness action plans they recommend to and/or complete with patients with COPD to help them manage a sudden worsening of breathlessness that is not due to an acute exacerbation of COPD.

If you use more than one plan, please complete a separate questionnaire for each.

If you would prefer to answer these questions via a telephone/Zoom interview, please contact the project team via [breathe@uts.edu.au](mailto:breathe@uts.edu.au) or 02 9514 4861.

You can find the [participant information sheet](#) here.

Which discipline do you work in? Tick all that apply.

- Medicine
- Nursing
- Allied Health
- Other, please specify:

Which specialty do you work in? Tick all that apply.

- Respiratory and Sleep Medicine
- Specialist Palliative Care
- General Practice
- Other, please specify:

Which setting do you work in? Tick all that apply.

- Inpatient
- Outpatient
- Community
- Pulmonary rehabilitation
- Other, please specify:

**What country do you work in?**

- Australia
- New Zealand
- Other, please specify:

**What postal code / ZIP code do you work in?**

**Of your patients with COPD, what proportion do you recommend the breathlessness action plan to / complete the plan with?**

- All
- Most
- Some
- Only a very small proportion
- Not applicable

**If the action plan is one you or your service developed, how was the content chosen? Tick all that apply.**

- We didn't develop it
- Direct patient input
- Clinical experience
- Adapted from other breathlessness action plans
- Evidence or recommendations from the literature
- Other, please specify:

Of the patients who you give the plan to, what proportion do you think benefit?

- Unsure
- None
- Some
- Most
- All
- Not applicable

### Conditional block 2

Published evidence for breathlessness action plans is limited. How have you monitored the effectiveness of the breathlessness action plan at your service?

Tick all that apply.

- Patients tell me whether the plan has helped them
- Families tell me whether the plan has helped them
- Survey of patients / families
- Medical record review (e.g., ED presentations, GP visits, frequency of prescriptions)
- Clinical trial
- Other, please specify:

What benefits do you think patients / families derive from the breathlessness action plan? Tick all that apply.

- Unsure
- Increased confidence / reduced anxiety
- Increased activities of daily living
- Reduced frequency of breathlessness crises / acute-on-chronic episodes
- Reduced need for ambulance / emergency department
- Other, please specify:

**In your service, how is the breathlessness action plan introduced to patients for first time? Tick all that apply.**

- A paper copy or weblink is provided
- A health professional explains how to use the plan
- A health professional personalises the plan to each patient / family
- A health professional checks the person's ability to use the plan (e.g., teach-back, scenario planning)
- Other, please specify:

**At your service, which health professionals usually introduce the breathlessness action plan to patients / families (e.g., pulmonary rehabilitation staff, community nurse, outpatient physiotherapist, palliative care physician)**

- I do it myself
- Other, please specify:

**In addition to the breathlessness action plan, what other education or resources do you provide to patients / families for managing breathlessness? Please include any referrals you make for this purpose. Tick all that apply.**

- Hand-held fan
- Relaxation / mindfulness resources
- Loan equipment (e.g., mobility aids)
- Dietary advice
- Exercise program
- Contact number – business hours
- Contact number – out of hours
- Other, please specify:

**Why did you choose to use this particular plan rather than others that are available? Tick all that apply.**

- It's the only one I know of
- It's approved for my service
- It's easy to follow for patients / families
- It allows tailoring to each patient
- Other, please specify:

Is there anything you DON'T like about the plan or feel that is missing? Please describe any modifications you've made to improve the plan.

Please upload the action plan by dragging a pdf copy into the upload box below. If you only have a paper version, you can scan or take a photo of the plan and upload that.

If the action plan is available via a website, please provide a link in the comment box below instead of uploading it. If you can't provide the plan or link, please tell us the name/title and organisation in the comments box. We will reference the authors of each plan included in our report.

Add link or provide us the name/title and organisation here:

Please tell us anything else you think is relevant here:

Powered by Qualtrics

## Supplementary File 3: Detailed Analysis of Plans

**Table 1. Source summary of plans included for analysis (n=69)**

| Source                             | Number of Plans (%) |
|------------------------------------|---------------------|
| <b>Survey results</b>              |                     |
| User survey <sup>a</sup>           | 21 (30)             |
| Clinician survey <sup>b</sup>      | 10 (14)             |
| <b>Scoping review</b>              |                     |
| Internet search only               | 34 (49)             |
| Also included in literature search | 4 (6)               |

<sup>a</sup> Strategies only, as reported by respondents in free-text responses

<sup>b</sup> Plans reported here not known from scoping review, including those created by the clinician themselves or the service they worked for

**Table 2. Summary of survey respondents indicating use of a plan known from the scoping review**

| <b>Known Plan from scoping review</b>                                                 | <b>Number of Respondents</b> |                         |              |
|---------------------------------------------------------------------------------------|------------------------------|-------------------------|--------------|
|                                                                                       | <b>Plan-user survey</b>      | <b>Clinician survey</b> | <b>Total</b> |
| Lung Foundation Australia COPD Action Plan (Australia)                                | 9                            | 12                      | 21           |
| Asthma and Respiratory Foundation NZ Breathlessness Strategies for COPD (New Zealand) | 1                            | 11                      | 12           |
| INSPIRE: Breathing Better (Australia)                                                 | 0                            | 3                       | 3            |
| American Thoracic Society (USA)                                                       | 1                            | 2                       | 3            |
| Health Resource Directory (Australia)                                                 | 1                            | 1                       | 2            |
| WA Country Health Service (Australia)                                                 | 0                            | 2                       | 2            |
| HammondCare (Australia)                                                               | 0                            | 1                       | 1            |
| Royal Melbourne Hospital Breathlessness Management Plan (Australia)                   | 0                            | 1                       | 1            |
| Cambridge Breathlessness Intervention Service (UK)                                    | 0                            | 1                       | 1            |
| Hull University (UK)                                                                  | 0                            | 1                       | 1            |

**Table 3. Summary of Content Analysis of Plans – Description**

| Plan Number                                                                                                                                                                           | Plan                                                              | Source          | Web Link                                                                                                                                                                                                                                            | Country of Origin | Clinical Use               | Targeted Audience                           |
|---------------------------------------------------------------------------------------------------------------------------------------------------------------------------------------|-------------------------------------------------------------------|-----------------|-----------------------------------------------------------------------------------------------------------------------------------------------------------------------------------------------------------------------------------------------------|-------------------|----------------------------|---------------------------------------------|
| These NHS (UK) Plans are similar:                                                                                                                                                     |                                                                   |                 |                                                                                                                                                                                                                                                     |                   |                            |                                             |
| Plan 1                                                                                                                                                                                | NHS - Non Pharmacological Breathlessness Management, page 21 (UK) | Internet search | Unavailable                                                                                                                                                                                                                                         | United Kingdom    | Unspecified breathlessness | Person with breathlessness & Support Person |
| Plan 2                                                                                                                                                                                | NHS Coventry and Warwickshire University Hospitals                | Internet search | Unavailable                                                                                                                                                                                                                                         | United Kingdom    | Unspecified breathlessness | Person with breathlessness                  |
| Plan 3                                                                                                                                                                                | NHS Royal Papworth Hospital                                       | Internet search | <a href="https://royalpapworth.nhs.uk/application/files/7216/4431/7931/PI_144_Breathlessness_vs3.1.pdf">https://royalpapworth.nhs.uk/application/files/7216/4431/7931/PI_144_Breathlessness_vs3.1.pdf</a>                                           | United Kingdom    | Unspecified breathlessness | Person with breathlessness                  |
| Plan 4                                                                                                                                                                                | NHS West Suffolk                                                  | Internet search | <a href="https://www.wsh.nhs.uk/CMS-Documents/Patient-leaflets/Physiotherapy/6350-1-Breathlessness-and-how-to-manage-it.pdf">https://www.wsh.nhs.uk/CMS-Documents/Patient-leaflets/Physiotherapy/6350-1-Breathlessness-and-how-to-manage-it.pdf</a> | United Kingdom    | Unspecified breathlessness | Person with breathlessness                  |
| Plan 5                                                                                                                                                                                | NHS St Christopher's Hospice                                      | Internet search | <a href="https://www.stchristophers.org.uk/managing-your-breathlessness-booklet">https://www.stchristophers.org.uk/managing-your-breathlessness-booklet</a>                                                                                         | United Kingdom    | Unspecified breathlessness | Person with breathlessness                  |
| These NHS (UK) plans are based on the Cambridge Breathlessness Intervention Service- more focussed on <b>Breathing</b> [ie. 3 F's in different order/graphical differences]:          |                                                                   |                 |                                                                                                                                                                                                                                                     |                   |                            |                                             |
| Plan 6                                                                                                                                                                                | NHS Oxford (breathing)                                            | Internet search | <a href="https://www.oxfordhealth.nhs.uk/wp-content/uploads/2020/03/OH-172.20-Managing-your-breathlessness-D3.pdf">https://www.oxfordhealth.nhs.uk/wp-content/uploads/2020/03/OH-172.20-Managing-your-breathlessness-D3.pdf</a>                     | United Kingdom    | Unspecified breathlessness | Person with breathlessness                  |
| Plan 7                                                                                                                                                                                | NHS Cambridge University Hospitals (breathing)                    | Internet search | Unavailable                                                                                                                                                                                                                                         | United Kingdom    | Unspecified breathlessness | Person with breathlessness                  |
| Plan 8                                                                                                                                                                                | NHS Highland (breathing)                                          | Internet search | Unavailable                                                                                                                                                                                                                                         | United Kingdom    | Unspecified breathlessness | Person with breathlessness                  |
| These NHS (UK) plans are based on the Cambridge Breathlessness Intervention Service- more focussed on <b>Thinking</b> [ie. Thinking + 3 Fs in different order/graphical differences]: |                                                                   |                 |                                                                                                                                                                                                                                                     |                   |                            |                                             |
| Plan 9                                                                                                                                                                                | NHS Cambridge University Hospitals (thinking)                     | Internet search | Unavailable                                                                                                                                                                                                                                         | United Kingdom    | Unspecified breathlessness | Person with breathlessness                  |
| Plan 10                                                                                                                                                                               | NHS Highland (thinking)                                           | Internet search | Unavailable                                                                                                                                                                                                                                         | United Kingdom    | Unspecified breathlessness | Person with breathlessness                  |
| Plan 11                                                                                                                                                                               | Cambridge Breathlessness                                          | Internet search | Unavailable                                                                                                                                                                                                                                         | United Kingdom    | Unspecified breathlessness | Person with breathlessness                  |

|                                                                                                          |                                                                                  |                 |                                                                                                                                                                                                                                                                     |                |                            |                            |
|----------------------------------------------------------------------------------------------------------|----------------------------------------------------------------------------------|-----------------|---------------------------------------------------------------------------------------------------------------------------------------------------------------------------------------------------------------------------------------------------------------------|----------------|----------------------------|----------------------------|
|                                                                                                          | Intervention Service Toolkit                                                     |                 |                                                                                                                                                                                                                                                                     |                |                            |                            |
| Plan 12                                                                                                  | St Catherine's Hospice                                                           | Internet search | <a href="https://www.stch.org.uk/wp-content/uploads/2020/09/action-plan-for-breathlessness.pdf">https://www.stch.org.uk/wp-content/uploads/2020/09/action-plan-for-breathlessness.pdf</a>                                                                           | United Kingdom | Unspecified breathlessness | Person with breathlessness |
| These plans are based on the NHS iCope Service (UK) and can be considered the same across all resources: |                                                                                  |                 |                                                                                                                                                                                                                                                                     |                |                            |                            |
| Plan 13(a)                                                                                               | NHS Camden and Islington - iCope (Anxiety and Panic)                             | Internet search | <a href="https://www.icope.nhs.uk/wp-content/uploads/2021/02/A3-Managing-Breathlessness-Guide_Anxiety-Panic_FINAL.pdf">https://www.icope.nhs.uk/wp-content/uploads/2021/02/A3-Managing-Breathlessness-Guide_Anxiety-Panic_FINAL.pdf</a>                             | United Kingdom | Unspecified breathlessness | Person with breathlessness |
| Plan 13(b)                                                                                               | NHS Camden and Islington - iCope (Physical Activity and Exertion)                | Internet search | <a href="https://www.icope.nhs.uk/wp-content/uploads/2021/02/A4-Managing-Breathlessness-Guide_Physical-activity-exercise_FINAL.pdf">https://www.icope.nhs.uk/wp-content/uploads/2021/02/A4-Managing-Breathlessness-Guide_Physical-activity-exercise_FINAL.pdf</a>   | United Kingdom | Unspecified breathlessness | Person with breathlessness |
| Plan 13(c)                                                                                               | NHS Camden and Islington - iCope (Relaxation and Breathing)                      | Internet search | <a href="https://www.icope.nhs.uk/wp-content/uploads/2021/02/C1-Guide_-relaxation-breathing-techniques_FINAL.pdf">https://www.icope.nhs.uk/wp-content/uploads/2021/02/C1-Guide_-relaxation-breathing-techniques_FINAL.pdf</a>                                       | United Kingdom | Unspecified breathlessness | Person with breathlessness |
| Plan 13(d)                                                                                               | NHS Camden and Islington - iCope (Managing Breathlessness)                       | Internet search | <a href="https://www.icope.nhs.uk/wp-content/uploads/2021/02/A1-Managing-Breathlessness-Guide_What-causes-breathlessness_-FINAL.pdf">https://www.icope.nhs.uk/wp-content/uploads/2021/02/A1-Managing-Breathlessness-Guide_What-causes-breathlessness_-FINAL.pdf</a> | United Kingdom | Unspecified breathlessness | Person with breathlessness |
| Other Plans:                                                                                             |                                                                                  |                 |                                                                                                                                                                                                                                                                     |                |                            |                            |
| Plan 14                                                                                                  | Health Resource Directory (South Western Sydney PHN)                             | Internet search | <a href="https://healthresourcedirectory.org.au/en/health-resource-directory/shortness-of-breath-action-plan/">https://healthresourcedirectory.org.au/en/health-resource-directory/shortness-of-breath-action-plan/</a>                                             | Australia      | Unspecified breathlessness | Person with breathlessness |
| Plan 15                                                                                                  | HammondCare                                                                      | Internet search | <a href="https://www.hammond.com.au/health/palliative-care">https://www.hammond.com.au/health/palliative-care</a>                                                                                                                                                   | Australia      | Palliative care            | Person with breathlessness |
| Plan 16                                                                                                  | Territory Palliative Care Plan (accompanies 'Sick Lungs' Guide)                  | Internet search | Unavailable                                                                                                                                                                                                                                                         | Australia      | Palliative care            | Person with breathlessness |
| Plan 17                                                                                                  | Managing Your Breathlessness At Home - Central Coast Local Health District (NSW) | Internet search | Unavailable                                                                                                                                                                                                                                                         | Australia      | Respiratory care           | Person with breathlessness |
| Plan 18                                                                                                  | Thoracare Subiaco                                                                | Internet search | <a href="https://thoracarephysiotherapy.com.au/wp-content/uploads/2019/11/Thoracare-Managing-breathlessness.pdf">https://thoracarephysiotherapy.com.au/wp-content/uploads/2019/11/Thoracare-Managing-breathlessness.pdf</a>                                         | Australia      | Unspecified breathlessness | Person with breathlessness |

|         |                                                             |                 |                                                                                                                                                                                                                                                                           |                |                              |                                             |
|---------|-------------------------------------------------------------|-----------------|---------------------------------------------------------------------------------------------------------------------------------------------------------------------------------------------------------------------------------------------------------------------------|----------------|------------------------------|---------------------------------------------|
| Plan 19 | Asthma & Respiratory Foundation, New Zealand                | Internet search | <a href="https://www.asthmafoundation.org.nz/assets/document/s/2021-ARFNZ-breathlessness-quick-reference-2_RLR_2021.pdf">https://www.asthmafoundation.org.nz/assets/document/s/2021-ARFNZ-breathlessness-quick-reference-2_RLR_2021.pdf</a>                               | New Zealand    | Unspecified breathlessness   | Person with breathlessness                  |
| Plan 20 | Cancer Society, New Zealand                                 | Internet search | <a href="https://www.cancer.org.nz/cancer/cancer-treatment/side-effects-of-cancer-and-treatment/breathlessness/">https://www.cancer.org.nz/cancer/cancer-treatment/side-effects-of-cancer-and-treatment/breathlessness/</a>                                               | New Zealand    | Cancer care                  | Person with breathlessness                  |
| Plan 21 | Leeds Centre for Respiratory Medicine (UK)                  | Internet search | Unavailable                                                                                                                                                                                                                                                               | United Kingdom | Respiratory care             | Person with breathlessness & Support Person |
| Plan 22 | University of Hull - Bringing Breathlessness into View (UK) | Internet search | <a href="https://www.hyms.ac.uk/assets/docs/research/bringing-breathlessness-into-view.pdf">https://www.hyms.ac.uk/assets/docs/research/bringing-breathlessness-into-view.pdf</a>                                                                                         | United Kingdom | Unspecified breathlessness   | Person with breathlessness                  |
| Plan 23 | Cancer Council (Aus)                                        | Internet search | <a href="https://www.cancervic.org.au/downloads/resources/bo-oklets/Living-with-Advanced-Cancer.pdf">https://www.cancervic.org.au/downloads/resources/bo-oklets/Living-with-Advanced-Cancer.pdf</a>                                                                       | United Kingdom | Palliative care; Cancer care | Person with breathlessness                  |
| Plan 24 | Part of LFA COPD Action Plan                                | Internet search | <a href="https://lungfoundation.com.au/resources/copd-action-plan/">https://lungfoundation.com.au/resources/copd-action-plan/</a>                                                                                                                                         | Australia      | COPD                         | Person with breathlessness                  |
| Plan 25 | Asthma WA (webpage)                                         | Internet search |                                                                                                                                                                                                                                                                           | Australia      | Respiratory care             | Person with breathlessness                  |
| Plan 26 | NHS Breathlessness                                          | Internet search | <a href="https://mft.nhs.uk/app/uploads/2021/05/Breathlessness.pdf">https://mft.nhs.uk/app/uploads/2021/05/Breathlessness.pdf</a>                                                                                                                                         | United Kingdom | Respiratory care             | Person with breathlessness                  |
| Plan 27 | Part of Chiesi Air COPD Action Plan                         | Internet search | <a href="https://www.chiesi.co.uk/app/uploads/sites/3/2022/09/01-Breathing-Well-COPD-Action-Plan-2-pages-UK-WEL-2100010-V8_INT.pdf">https://www.chiesi.co.uk/app/uploads/sites/3/2022/09/01-Breathing-Well-COPD-Action-Plan-2-pages-UK-WEL-2100010-V8_INT.pdf</a>         | United Kingdom | COPD                         | Person with breathlessness                  |
| Plan 28 | INSPIRE                                                     | Internet search | <a href="https://inspirebreathingbetter.com/breathlessness-plans">https://inspirebreathingbetter.com/breathlessness-plans</a>                                                                                                                                             | Australia      | Unspecified breathlessness   | Person with breathlessness                  |
| Plan 29 | Auckland Hospital Palliative Care Service (NZ)              | Internet search | <a href="https://healthify.nz/health-a-z/p/palliative-care-breathlessness">https://healthify.nz/health-a-z/p/palliative-care-breathlessness</a>                                                                                                                           | New Zealand    | Palliative care              | Person with breathlessness                  |
| Plan 30 | Dover Park Hospice (Singapore)                              | Internet search | Unavailable                                                                                                                                                                                                                                                               | Singapore      | Unspecified breathlessness   | Person with breathlessness                  |
| Plan 31 | Part of United Healthcare COPD Action Plan (US)             | Internet search | Unavailable                                                                                                                                                                                                                                                               | United States  | Respiratory care             | Person with breathlessness                  |
| Plan 32 | Supporting Breathlessness - Support Person Focussed (UK)    | Internet search | <a href="https://supporting-breathlessness.org.uk/wp-content/uploads/2020/05/SSwB-website-download-Stress-Panic-and-Breathlessness.pdf">https://supporting-breathlessness.org.uk/wp-content/uploads/2020/05/SSwB-website-download-Stress-Panic-and-Breathlessness.pdf</a> | United Kingdom | Unspecified breathlessness   | Support Person                              |
| Plan 33 | Caring at Home Plan                                         | Internet search | <a href="https://www.caringathomeproject.com.au/resources/community-resources/tip-sheet-help-with-shortness-of-breath-tipsheet">https://www.caringathomeproject.com.au/resources/community-resources/tip-sheet-help-with-shortness-of-breath-tipsheet</a>                 | Australia      | Palliative care              | Support Person                              |

|         |                                                          |                                    |                                                                                                                                                                                                                                                                                               |                |                            |                                             |
|---------|----------------------------------------------------------|------------------------------------|-----------------------------------------------------------------------------------------------------------------------------------------------------------------------------------------------------------------------------------------------------------------------------------------------|----------------|----------------------------|---------------------------------------------|
| Plan 34 | Heart Failure Action Plan for Breathlessness             | Internet search                    | <a href="https://www.researchgate.net/figure/Heart-failure-action-plan-for-breathlessness-000-is-the-emergency-response-number-in_fig2_338163718">https://www.researchgate.net/figure/Heart-failure-action-plan-for-breathlessness-000-is-the-emergency-response-number-in_fig2_338163718</a> | Australia      | Cardiac care               | Person with breathlessness                  |
| Plan 35 | INSPIRED Program                                         | Literature search; Internet search | <a href="https://cahs-acss.ca/wp-content/uploads/2015/07/INSPIRED-Approaches-to-Better-Care-for-Patients-with-Advanced-COPD.pdf">https://cahs-acss.ca/wp-content/uploads/2015/07/INSPIRED-Approaches-to-Better-Care-for-Patients-with-Advanced-COPD.pdf</a>                                   | Canada         | COPD                       | Person with breathlessness                  |
| Plan 36 | Breathlessness RELief AT Home (BREATHE) study (UK)       | Literature search; Internet search | <a href="https://pmc.ncbi.nlm.nih.gov/articles/PMC9677245/">https://pmc.ncbi.nlm.nih.gov/articles/PMC9677245/</a>                                                                                                                                                                             | United Kingdom | Unspecified breathlessness | Person with breathlessness                  |
| Plan 37 | American Thoracic Society (US)                           | Literature search; Internet search | <a href="https://www.thoracic.org/patients/patient-resources/resources/sudden-breathlessness.pdf">https://www.thoracic.org/patients/patient-resources/resources/sudden-breathlessness.pdf</a>                                                                                                 | United States  | Unspecified breathlessness | Person with breathlessness & Support Person |
| Plan 38 | The Royal Melbourne Hospital                             | Literature search; Internet search | <a href="https://onlinelibrary-wiley-com.ezproxy.lib.uts.edu.au/doi/full/10.1111/resp.13324">https://onlinelibrary-wiley-com.ezproxy.lib.uts.edu.au/doi/full/10.1111/resp.13324</a>                                                                                                           | Australia      | Respiratory care           | Person with breathlessness                  |
| Plan 39 | Northern Territory Health                                | HP survey                          | Unavailable                                                                                                                                                                                                                                                                                   | Australia      | Unspecified breathlessness | Person with breathlessness                  |
| Plan 40 | NSW Agency for Clinical Innovation                       | HP survey                          | Unavailable                                                                                                                                                                                                                                                                                   | Australia      | Unspecified breathlessness | Person with breathlessness                  |
| Plan 41 | WA Country Health Service                                | HP survey                          | Unavailable                                                                                                                                                                                                                                                                                   | Australia      | Unspecified breathlessness | Person with breathlessness                  |
| Plan 42 | Western District Health Service, Hamilton Victoria       | HP survey                          | Unavailable                                                                                                                                                                                                                                                                                   | Australia      | Respiratory care           | Person with breathlessness                  |
| Plan 43 | Self-Developed Plan (Unknown)                            | HP survey                          | Unavailable                                                                                                                                                                                                                                                                                   | Australia      | Unspecified breathlessness | Person with breathlessness                  |
| Plan 44 | Self-Developed (Royal Perth Hospital)                    | HP survey                          | Unavailable                                                                                                                                                                                                                                                                                   | Australia      | Respiratory care           | Person with breathlessness                  |
| Plan 45 | Self-Developed (St Vincent's Public Hospital, Melbourne) | HP survey                          | Unavailable                                                                                                                                                                                                                                                                                   | Australia      | Unspecified breathlessness | Person with breathlessness                  |
| Plan 46 | Self-Developed (South Eastern Sydney LHD)                | HP survey                          | Unavailable                                                                                                                                                                                                                                                                                   | Australia      | Unspecified breathlessness | Person with breathlessness                  |
| Plan 47 | Nelson Tasman Hospice                                    | HP survey                          | Unavailable                                                                                                                                                                                                                                                                                   | New Zealand    | Palliative care            | Person with breathlessness                  |
| Plan 48 | Self-Developed (Te Whatu Ora Lakes, NZ)                  | HP survey                          | Unavailable                                                                                                                                                                                                                                                                                   | New Zealand    | Palliative care            | Person with breathlessness                  |

|             |                                              |                  |             |           |                                                                                                                                                              |
|-------------|----------------------------------------------|------------------|-------------|-----------|--------------------------------------------------------------------------------------------------------------------------------------------------------------|
| Plans 49-69 | Self-developed (reported as survey response) | Plan-user survey | Unavailable | Australia | Plans were outlined in free-text boxes (ie. no attachment provided to new resource) - see <b>Table 5</b> for content analysis of only strategies recommended |
|-------------|----------------------------------------------|------------------|-------------|-----------|--------------------------------------------------------------------------------------------------------------------------------------------------------------|

**Table 4. Summary of Content Analysis of Plans – Key Characteristics**

| Plan Number                                                                                                                                                                           | Plan                                                              | Reason Given to Start Plan | Prompt for Medical Management (Type) | Prompt for Oxygen | Time Noted Before Prompt for Medical Management | Prompt to Seek Further Medical Assistance (Type) | Emergency Number Included | Able to Be Personalised |
|---------------------------------------------------------------------------------------------------------------------------------------------------------------------------------------|-------------------------------------------------------------------|----------------------------|--------------------------------------|-------------------|-------------------------------------------------|--------------------------------------------------|---------------------------|-------------------------|
| These NHS (UK) Plans are similar:                                                                                                                                                     |                                                                   |                            |                                      |                   |                                                 |                                                  |                           |                         |
| Plan 1                                                                                                                                                                                | NHS - Non Pharmacological Breathlessness Management, page 21 (UK) | no                         | no                                   | no                | no                                              | no                                               | no                        | no                      |
| Plan 2                                                                                                                                                                                | NHS Coventry and Warwickshire University Hospitals                | no                         | no                                   | no                | no                                              | no                                               | no                        | no                      |
| Plan 3                                                                                                                                                                                | NHS Royal Papworth Hospital                                       | no                         | no                                   | no                | no                                              | no                                               | no                        | no                      |
| Plan 4                                                                                                                                                                                | NHS West Suffolk                                                  | no                         | Yes (inhaler)                        | no                | yes                                             | no (noted to call family or friend)              | no                        | no                      |
| Plan 5                                                                                                                                                                                | NHS St Christopher's Hospice                                      | no                         | no                                   | no                | no                                              | no                                               | no                        | no                      |
| These NHS (UK) plans are based on the Cambridge Breathlessness Intervention Service- more focussed on <b>Breathing</b> [ie. 3 F's in different order/graphical differences]:          |                                                                   |                            |                                      |                   |                                                 |                                                  |                           |                         |
| Plan 6                                                                                                                                                                                | NHS Oxford (breathing)                                            | no                         | no                                   | no                | no                                              | no                                               | no                        | no                      |
| Plan 7                                                                                                                                                                                | NHS Cambridge University Hospitals (breathing)                    | yes                        | no                                   | no                | no                                              | no                                               | no                        | no                      |
| Plan 8                                                                                                                                                                                | NHS Highland (breathing)                                          | yes                        | no                                   | no                | no                                              | no                                               | no                        | no                      |
| These NHS (UK) plans are based on the Cambridge Breathlessness Intervention Service- more focussed on <b>Thinking</b> [ie. Thinking + 3 Fs in different order/graphical differences]: |                                                                   |                            |                                      |                   |                                                 |                                                  |                           |                         |
| Plan 9                                                                                                                                                                                | NHS Cambridge University Hospitals (thinking)                     | yes                        | no                                   | no                | no                                              | no                                               | no                        | no                      |
| Plan 10                                                                                                                                                                               | NHS Highland (thinking)                                           | yes                        | no                                   | no                | no                                              | no                                               | no                        | no                      |
| Plan 11                                                                                                                                                                               | Cambridge Breathlessness Intervention Service Toolkit             | no                         | no                                   | no                | no                                              | no                                               | no                        | no                      |
| Plan 12                                                                                                                                                                               | St Catherine's Hospice                                            | no                         | no                                   | no                | no                                              | no                                               | no                        | no                      |

| These plans are based on the NHS iCope Service (UK) and can be considered the same across all resources: |                                                                                  |    |                                                       |     |                  |                                          |     |                                                                       |
|----------------------------------------------------------------------------------------------------------|----------------------------------------------------------------------------------|----|-------------------------------------------------------|-----|------------------|------------------------------------------|-----|-----------------------------------------------------------------------|
| Plan 13(a)                                                                                               | NHS Camden and Islington - iCope (Anxiety and Panic)                             | no | no                                                    | no  | no               | no                                       | no  | no                                                                    |
| Plan 13(b)                                                                                               | NHS Camden and Islington - iCope (Physical Activity and Exertion)                | no | no                                                    | no  | no               | no                                       | no  | no                                                                    |
| Plan 13(c)                                                                                               | NHS Camden and Islington - iCope (Relaxation and Breathing)                      | no | no                                                    | no  | no               | no                                       | no  | no                                                                    |
| Plan 13(d)                                                                                               | NHS Camden and Islington - iCope (Managing Breathlessness)                       | no | no                                                    | no  | no               | no                                       | no  | no                                                                    |
| Other Plans:                                                                                             |                                                                                  |    |                                                       |     |                  |                                          |     |                                                                       |
| Plan 14                                                                                                  | Health Resource Directory (South Western Sydney PHN)                             | no | Yes (Opioids; Benzodiazepine)                         | yes | no               | Yes (GP; After hours service; Ambulance) | yes | Yes (dosage of medications; name; date of birth; date of last review) |
| Plan 15                                                                                                  | HammondCare                                                                      | no | Yes (unspecified)                                     | no  | Yes (10 minutes) | Yes (community palliative care team)     | no  | Yes (dosage of medications; name)                                     |
| Plan 16                                                                                                  | Territory Palliative Care Plan (accompanies 'Sick Lungs' Guide)                  | no | Yes (Morphine syrup; Alprazolam; Reliever medication) | yes | Yes (10 minutes) | Yes (GP; ambulance)                      | yes | Yes (dosage of medications; name)                                     |
| Plan 17                                                                                                  | Managing Your Breathlessness At Home - Central Coast Local Health District (NSW) | no | no                                                    | no  | no               | no                                       | no  | no                                                                    |
| Plan 18                                                                                                  | Thoracare Subiaco                                                                | no | no                                                    | no  | no               | no                                       | no  | no                                                                    |
| Plan 19                                                                                                  | Asthma & Respiratory Foundation, New Zealand                                     | no | no                                                    | no  | no               | no                                       | no  | no                                                                    |
| Plan 20                                                                                                  | Cancer Society, New Zealand                                                      | no | no                                                    | no  | no               | no                                       | no  | no                                                                    |

|         |                                                             |     |                                                         |     |                                           |                                              |           |                                                                      |
|---------|-------------------------------------------------------------|-----|---------------------------------------------------------|-----|-------------------------------------------|----------------------------------------------|-----------|----------------------------------------------------------------------|
| Plan 21 | Leeds Centre for Respiratory Medicine (UK)                  | no  | Yes (Inhaler; Nebuliser; Salbutamol; Rescue medication) | yes | no                                        | no                                           | no        | Yes (phone number of healthcare professional)                        |
| Plan 22 | University of Hull - Bringing Breathlessness into View (UK) | no  | no                                                      | no  | no                                        | no                                           | no        | no                                                                   |
| Plan 23 | Cancer Council (Aus)                                        | no  | no                                                      | no  | no                                        | no                                           | no        | no                                                                   |
| Plan 24 | Part of LFA COPD Action Plan                                | yes | yes (Inhaler)                                           | no  | Yes (2-3 minutes)                         | no                                           | no        | no                                                                   |
| Plan 25 | Asthma WA (webpage)                                         | yes | no                                                      | no  | no                                        | no                                           | no        | no                                                                   |
| Plan 26 | NHS Breathlessness                                          | yes | no                                                      | no  | no                                        | no                                           | no        | no                                                                   |
| Plan 27 | Part of Chiesi Air COPD Action Plan                         | yes | no                                                      | no  | no                                        | no                                           | no        | no                                                                   |
| Plan 28 | INSPIRE                                                     | yes | Yes (unspecified)                                       | yes | No (but mentions 30 minutes to use again) | Yes (can be personalised)                    | Yes (000) | Yes (dosage of medications; phone number of healthcare professional) |
| Plan 29 | Auckland Hospital Palliative Care Service (NZ)              | no  | Yes (unspecified)                                       | no  | no                                        | no                                           | no        | no                                                                   |
| Plan 30 | Dover Park Hospice (Singapore)                              | no  | Yes (Inhaler; opioids)                                  | yes | 30 minutes                                | Yes (home care nurse; ambulance)             | Yes (995) | no                                                                   |
| Plan 31 | Part of United Healthcare COPD Action Plan (US)             | yes | no                                                      | no  | no                                        | no                                           | no        | no                                                                   |
| Plan 32 | Supporting Breathlessness - Support Person Focussed (UK)    | no  | Yes (Inhaler)                                           | no  | no                                        | no                                           | no        | no                                                                   |
| Plan 33 | Caring at Home Plan                                         | no  | yes                                                     | no  | no                                        | yes                                          | no        | Yes (phone number of healthcare professional)                        |
| Plan 34 | Heart Failure Action Plan for Breathlessness                | yes | Yes (Inhaler)                                           | no  | no                                        | Yes (Doctor; Heart failure nurse; ambulance) | Yes (000) | no                                                                   |

|         |                                                          |     |                                                 |     |                  |                                                          |           |                                                                                                 |
|---------|----------------------------------------------------------|-----|-------------------------------------------------|-----|------------------|----------------------------------------------------------|-----------|-------------------------------------------------------------------------------------------------|
| Plan 35 | INSPIRED Program                                         | yes | Yes (Anxiolytics; opioids)                      | yes | no               | Yes (ambulance)                                          | Yes       | Yes (dosage of medications; name; date of last review)                                          |
| Plan 36 | Breathlessness RELief AT Home (BREATHE) study (UK)       | no  | no                                              | no  | no               | no                                                       | no        | no                                                                                              |
| Plan 37 | American Thoracic Society (US)                           | yes | yes (Inhaler; Nebuliser; Morphine; Anxiolytics) | yes | no               | no                                                       | no        | Yes (dosage of medications)                                                                     |
| Plan 38 | The Royal Melbourne Hospital                             | yes | Yes (Inhaler)                                   | yes | no               | Yes (respiratory nurse; GP; ambulance)                   | Yes (000) | Yes (dosage of medications)                                                                     |
| Plan 39 | Northern Territory Health                                | yes | no                                              | no  | no               | no                                                       | no        | no                                                                                              |
| Plan 40 | NSW Agency for Clinical Innovation                       | no  | no                                              | no  | no               | no                                                       | no        | Yes (dosage of medications; name; date of birth; phone number of healthcare professional)       |
| Plan 41 | WA Country Health Service                                | yes | Yes (Anxiolytics; opioids; Inhaler)             | no  | no               | Yes (Support person; GP; After hours service; ambulance) | Yes (000) | Yes (dosage of medications; name; date of last review; phone number of healthcare professional) |
| Plan 42 | Western District Health Service, Hamilton Victoria       | yes | Yes (unspecified)                               | yes | no               | yes (respiratory nurse practitioner)                     | no        | Yes (dosage of medications; name; date of birth; date of last review)                           |
| Plan 43 | Self-Developed Plan (Unknown)                            | yes | no                                              | no  | no               | no                                                       | no        | no                                                                                              |
| Plan 44 | Self-Developed (Royal Perth Hospital)                    | yes | yes (Benzodiazepine)                            | yes | Yes (10 minutes) | Yes (community palliative care team; ambulance)          | Yes (000) | no                                                                                              |
| Plan 45 | Self-Developed (St Vincent's Public Hospital, Melbourne) | no  | Yes (Inhaler)                                   | yes | Yes (15 minutes) | yes (ambulance)                                          | Yes (000) | no                                                                                              |

|             |                                              |                                                                                                                                                              |                           |    |                  |              |    |                                                        |
|-------------|----------------------------------------------|--------------------------------------------------------------------------------------------------------------------------------------------------------------|---------------------------|----|------------------|--------------|----|--------------------------------------------------------|
| Plan 46     | Self-Developed (South Eastern Sydney LHD)    | yes                                                                                                                                                          | no                        | no | no               | no           | no | no                                                     |
| Plan 47     | Nelson Tasman Hospice                        | no                                                                                                                                                           | yes (unspecified)         | no | Yes (15 minutes) | yes          | no | Yes (dosage of medications; name; date of last review) |
| Plan 48     | Self-Developed (Te Whatu Ora Lakes, NZ)      | no                                                                                                                                                           | Yes (Midazolam; morphine) | no | no               | No (hospice) | no | no                                                     |
| Plans 49-69 | Self-developed (reported as survey response) | Plans were outlined in free-text boxes (ie. no attachment provided to new resource) - see <b>Table 5</b> for content analysis of only strategies recommended |                           |    |                  |              |    |                                                        |

**Table 5. Summary of Content Analysis of Plans – Non-Medicinal Strategies Recommended**

| Plan Number                       | Plan                                                              | Number of Non-Medicinal Strategies Recommended | Type of Strategies Recommended                                                                                                                | Step Order in Which Strategies are Recommended* |         |                      |                        |                       |                 |                                                                              |
|-----------------------------------|-------------------------------------------------------------------|------------------------------------------------|-----------------------------------------------------------------------------------------------------------------------------------------------|-------------------------------------------------|---------|----------------------|------------------------|-----------------------|-----------------|------------------------------------------------------------------------------|
|                                   |                                                                   |                                                |                                                                                                                                               | Stop                                            | Airflow | Breathing Techniques | Positioning Techniques | Relaxation Techniques | Loosen Clothing | Other                                                                        |
| These NHS (UK) Plans are similar: |                                                                   |                                                |                                                                                                                                               |                                                 |         |                      |                        |                       |                 |                                                                              |
| Plan 1                            | NHS - Non Pharmacological Breathlessness Management, page 21 (UK) | 6                                              | Stopping or slowing down; Physical positioning; Airflow to face; Relaxation/distraction techniques; Breathing techniques; Support from others | 1                                               | 4       | 3                    | 2                      | 5                     | n/a             | 6) Support from others - Massage between shoulder blades (by support person) |
| Plan 2                            | NHS Coventry and Warwickshire University Hospitals                | 4                                              | Airflow to face; Physical positioning; Relaxation/distraction techniques; Breathing techniques                                                | n/a                                             | 1       | 3                    | 2                      | n/a                   | n/a             | 4) Block out any distractions                                                |
| Plan 3                            | NHS Royal Papworth Hospital                                       | 4                                              | Stopping or slowing down; Physical positioning; Breathing techniques; Airflow to face                                                         | 1                                               | 4       | 3                    | 2                      | n/a                   | n/a             | n/a                                                                          |
| Plan 4                            | NHS West Suffolk                                                  | 5                                              | Physical positioning; Breathing techniques; Support from others; Relaxation/distraction techniques; Airflow to face                           | n/a                                             | 3       | 2                    | 1                      | 4                     | n/a             | 5) Support from others - phone call to get someone to help you through it    |
| Plan 5                            | NHS St Christopher's Hospice                                      | 4                                              | Stopping or slowing down; Breathing techniques; Airflow to face; Physical positioning                                                         | 1                                               | n/a     | 3                    | 2                      | 4                     | n/a             | n/a                                                                          |

| These NHS (UK) plans are based on the Cambridge Breathlessness Intervention Service- more focussed on <b>Breathing</b> [ie. 3 F's in different order/graphical differences]:          |                                                                   |   |                                                                                                         |     |     |   |   |     |     |                                                 |
|---------------------------------------------------------------------------------------------------------------------------------------------------------------------------------------|-------------------------------------------------------------------|---|---------------------------------------------------------------------------------------------------------|-----|-----|---|---|-----|-----|-------------------------------------------------|
| Plan 6                                                                                                                                                                                | NHS Oxford (breathing)                                            | 3 | Breathing techniques; Airflow to face; Physical positioning                                             | n/a | 2   | 1 | 3 | n/a | n/a | n/a                                             |
| Plan 7                                                                                                                                                                                | NHS Cambridge University Hospitals (breathing)                    | 3 | Airflow to face; Physical positioning; Breathing techniques                                             | n/a | 1   | 3 | 2 | n/a | n/a | n/a                                             |
| Plan 8                                                                                                                                                                                | NHS Highland (breathing)                                          | 3 | Airflow to face; Physical positioning; Breathing techniques                                             | n/a | 1   | 3 | 2 | n/a | n/a | n/a                                             |
| These NHS (UK) plans are based on the Cambridge Breathlessness Intervention Service- more focussed on <b>Thinking</b> [ie. Thinking + 3 Fs in different order/graphical differences]: |                                                                   |   |                                                                                                         |     |     |   |   |     |     |                                                 |
| Plan 9                                                                                                                                                                                | NHS Cambridge University Hospitals (thinking)                     | 4 | Reassurance; Physical positioning; Airflow to face; Breathing techniques                                | n/a | 3   | 4 | 2 | n/a | n/a | 1) Reassurance - Positive, reassuring self-talk |
| Plan 10                                                                                                                                                                               | NHS Highland (thinking)                                           | 4 | Reassurance; Physical positioning; Airflow to face; Breathing techniques                                | n/a | 3   | 4 | 2 | n/a | n/a | 1) Reassurance - Positive, reassuring self-talk |
| Plan 11                                                                                                                                                                               | Cambridge Breathlessness Intervention Service Toolkit             | 4 | Reassurance; Physical positioning; Airflow to face; Breathing techniques                                | n/a | 3   | 4 | 2 | n/a | n/a | 1) Reassurance - Positive, reassuring self-talk |
| Plan 12                                                                                                                                                                               | St Catherine's Hospice                                            | 4 | Reassurance; Physical positioning; Airflow to face; Breathing techniques                                | n/a | 3   | 4 | 2 | n/a | n/a | 1) Reassurance - Positive, reassuring self-talk |
| These plans are based on the NHS iCope Service (UK) and can be considered the same across all resources:                                                                              |                                                                   |   |                                                                                                         |     |     |   |   |     |     |                                                 |
| Plan 13(a)                                                                                                                                                                            | NHS Camden and Islington - iCope (Anxiety and Panic)              | 4 | Stopping or slowing down; Physical positioning; Breathing techniques; Relaxation/distraction techniques | 1   | n/a | 3 | 2 | 4   | n/a | n/a                                             |
| Plan 13(b)                                                                                                                                                                            | NHS Camden and Islington - iCope (Physical Activity and Exertion) | 4 | Stopping or slowing down; Physical positioning; Breathing techniques;                                   | 1   | n/a | 3 | 2 | 4   | n/a | n/a                                             |

|              |                                                                                  |   |                                                                                                                    |     |     |   |   |     |     |     |
|--------------|----------------------------------------------------------------------------------|---|--------------------------------------------------------------------------------------------------------------------|-----|-----|---|---|-----|-----|-----|
|              |                                                                                  |   | Relaxation/distraction techniques                                                                                  |     |     |   |   |     |     |     |
| Plan 13(c)   | NHS Camden and Islington - iCope (Relaxation and Breathing)                      | 4 | Stopping or slowing down; Physical positioning; Breathing techniques; Relaxation/distraction techniques            | 1   | n/a | 3 | 2 | 4   | n/a | n/a |
| Plan 13(d)   | NHS Camden and Islington - iCope (Managing Breathlessness)                       | 4 | Stopping or slowing down; Physical positioning; Breathing techniques; Relaxation/distraction techniques            | 1   | n/a | 3 | 2 | 4   | n/a | n/a |
| Other Plans: |                                                                                  |   |                                                                                                                    |     |     |   |   |     |     |     |
| Plan 14      | Health Resource Directory (South Western Sydney PHN)                             | 5 | Loosening clothing; Physical positioning; Airflow to face; Relaxation/distraction techniques; Breathing techniques | n/a | 3   | 5 | 2 | 4   | 1   | n/a |
| Plan 15      | HammondCare                                                                      | 4 | Stopping or slowing down; Physical positioning; Breathing techniques; Airflow to face                              | 1   | 4   | 3 | 2 | n/a | n/a | n/a |
| Plan 16      | Territory Palliative Care Plan (accompanies 'Sick Lungs' Guide)                  | 3 | Airflow to face; Physical positioning; Breathing techniques                                                        | n/a | 2   | 3 | 1 | n/a | n/a | n/a |
| Plan 17      | Managing Your Breathlessness At Home - Central Coast Local Health District (NSW) | 4 | Stopping or slowing down; Airflow to face; Physical positioning; Breathing techniques                              | 1   | 4   | 3 | 2 | n/a | n/a | n/a |
| Plan 18      | Thoracare Subiaco                                                                | 2 | Physical positioning; Relaxation/distraction techniques                                                            | n/a | n/a | 2 | 1 | n/a | n/a | n/a |

|         |                                                             |   |                                                                                                                      |     |     |     |   |     |     |                                                 |
|---------|-------------------------------------------------------------|---|----------------------------------------------------------------------------------------------------------------------|-----|-----|-----|---|-----|-----|-------------------------------------------------|
| Plan 19 | Asthma & Respiratory Foundation, New Zealand                | 4 | Stopping or slowing down; Airflow to face; Physical positioning; Breathing techniques                                | 1   | 3   | 4   | 2 | n/a | n/a | n/a                                             |
| Plan 20 | Cancer Society, New Zealand                                 | 5 | Stopping or slowing down; Reassurance; Relaxation/distraction techniques; Breathing techniques; Physical positioning | 1   |     | 2   | 4 | 5   | n/a | 3) Reassurance - Positive, reassuring self-talk |
| Plan 21 | Leeds Centre for Respiratory Medicine (UK)                  | 4 | Physical positioning; Airflow to face; Breathing techniques; Support from others                                     | n/a | 2   | 3   | 1 | n/a | n/a | 4) Support from others - Tell someone           |
| Plan 22 | University of Hull - Bringing Breathlessness into View (UK) | 4 | Reassurance; Physical positioning; Airflow to face; Breathing techniques                                             | n/a | 3   | 4   | 2 | n/a | n/a | 1) Reassurance - Positive, reassuring self-talk |
| Plan 23 | Cancer Council (Aus)                                        | 3 | Airflow to face; Physical positioning; Relaxation/distraction techniques                                             | n/a | 1   | n/a | 2 | 3   | n/a | n/a                                             |
| Plan 24 | Part of LFA COPD Action Plan                                | 4 | Stopping or slowing down; Physical positioning; Airflow to face; Breathing techniques                                | 1   | 3   | 4   | 2 | n/a | n/a | n/a                                             |
| Plan 25 | Asthma WA (webpage)                                         | 3 | Stopping or slowing down; Physical positioning; Breathing techniques                                                 | n/a | 2   | 3   | 1 | n/a | n/a | n/a                                             |
| Plan 26 | NHS Breathlessness                                          | 4 | Remaining calm; Physical positioning; Relaxation/distraction technique; Breathing techniques                         | 3   | n/a | 4   | 1 | 2   | n/a | n/a                                             |
| Plan 27 | Part of Chiesi Air COPD Action Plan                         | 3 | Stopping or slowing down; Physical                                                                                   | 1   | n/a | 3   | 2 | n/a | n/a | n/a                                             |

|         |                                                          |   |                                                                                                                                                         |     |     |   |     |     |     |                                      |
|---------|----------------------------------------------------------|---|---------------------------------------------------------------------------------------------------------------------------------------------------------|-----|-----|---|-----|-----|-----|--------------------------------------|
|         |                                                          |   | positioning; Breathing techniques                                                                                                                       |     |     |   |     |     |     |                                      |
| Plan 28 | INSPIRE                                                  | 5 | Physical positioning;<br>Airflow to face;<br>Breathing techniques;<br>Remaining calm;;<br>Relaxation/distraction techniques                             | n/a | 2   | 3 | 1   | 5   | n/a | 4) Remain calm                       |
| Plan 29 | Auckland Hospital Palliative Care Service (NZ)           | 6 | Remaining calm;<br>Stopping or slowing down;<br>Airflow to face;<br>Physical positioning;<br>Relaxation/distraction techniques;<br>Breathing techniques | 3   | 5   | 6 | 4   | 2   | n/a | 1) Remain calm                       |
| Plan 30 | Dover Park Hospice (Singapore)                           | 3 | Airflow to face;<br>Physical positioning;<br>Breathing techniques                                                                                       | n/a | 2   | 3 | 1   | n/a | n/a | n/a                                  |
| Plan 31 | Part of United Healthcare COPD Action Plan (US)          | 3 | Physical positioning;<br>Breathing techniques;<br>Relaxation/distraction techniques                                                                     | n/a | n/a | 2 | 1   | 3   | n/a | n/a                                  |
| Plan 32 | Supporting Breathlessness - Support Person Focussed (UK) | 5 | Airflow to face;<br>Physical positioning;<br>Relaxation/distraction techniques;<br>Support from others (acupressure);<br>Breathing techniques           | n/a | 1   | 3 | 2   | 5   | n/a | 4) Support from others - Acupressure |
| Plan 33 | Caring at Home Plan                                      | 5 | Physical positioning;<br>Airflow to face;<br>Breathing techniques;<br>Relaxation/distraction techniques;<br>Reassurance                                 | n/a | 2   | 3 | 1   | 4   |     | 5) Reassurance                       |
| Plan 34 | Heart Failure Action Plan for Breathlessness             | 2 | Stopping or slowing down;<br>Breathing techniques                                                                                                       | 1   | n/a | 2 | n/a | n/a | n/a | n/a                                  |

|         |                                                             |   |                                                                                                                                  |     |   |   |     |     |     |                                                           |
|---------|-------------------------------------------------------------|---|----------------------------------------------------------------------------------------------------------------------------------|-----|---|---|-----|-----|-----|-----------------------------------------------------------|
| Plan 35 | INSPIRED Program                                            | 3 | Airflow to face;<br>Physical positioning;<br>Breathing techniques                                                                | n/a | 1 | 2 | 3   | n/a | n/a | n/a                                                       |
| Plan 36 | Breathlessness<br>RELief AT HomE<br>(BREATHE) study<br>(UK) | 5 | Reassurance; Physical<br>positioning; Breathing<br>techniques; Airflow to<br>face;<br>Relaxation/distraction<br>techniques       | n/a | 4 | 3 | 2   | 5   | n/a | 1) Reassurance<br>- Positive,<br>reassuring self-<br>talk |
| Plan 37 | American Thoracic<br>Society (US)                           | 5 | Remaining calm;<br>Airflow to face;<br>Reassurance;<br>Relaxation/distraction<br>techniques; Breathing<br>techniques             | n/a | 2 | 5 | n/a | 3   | n/a | 1) Remain calm<br>4) Reassurance                          |
| Plan 38 | The Royal<br>Melbourne Hospital                             | 4 | Loosening clothing;<br>Stopping or slowing<br>down; Remaining<br>calm; Airflow to face                                           | n/a | 2 | 3 | 1   | 4   | n/a | n/a                                                       |
| Plan 39 | Northern Territory<br>Health                                | 4 | Stopping or slowing<br>down; Physical<br>positioning; Breathing<br>techniques; Airflow to<br>face                                | 1   | 3 | 4 | 2   | n/a | n/a | n/a                                                       |
| Plan 40 | NSW Agency for<br>Clinical Innovation                       | 3 | Airflow to face;<br>Physical positioning;<br>Breathing techniques                                                                | n/a | 2 | 3 | 1   | n/a | n/a | n/a                                                       |
| Plan 41 | WA Country Health<br>Service                                | 5 | Loosening clothing;<br>Airflow to face;<br>Physical positioning;<br>Relaxation/distraction<br>techniques; Breathing<br>technique | n/a | 1 | 4 | 3   | 5   | 2   | n/a                                                       |
| Plan 42 | Western District<br>Health Service,<br>Hamilton Victoria    | 4 | Airflow to face;<br>Physical positioning;<br>Breathing techniques;<br>Relaxation/distraction<br>techniques                       | n/a | 2 | 1 | 3   | 4   | n/a | n/a                                                       |

|         |                                                          |   |                                                                                                                          |     |     |     |     |     |     |                                                                                            |
|---------|----------------------------------------------------------|---|--------------------------------------------------------------------------------------------------------------------------|-----|-----|-----|-----|-----|-----|--------------------------------------------------------------------------------------------|
| Plan 43 | Self-Developed Plan (Unknown)                            | 5 | Stopping or slowing down; Airflow to face; Physical positioning; Relaxation/distraction techniques; Breathing techniques | 1   | 5   | 3   | 2   | 4   | n/a | n/a                                                                                        |
| Plan 44 | Self-Developed (Royal Perth Hospital)                    | 2 | Stopping or slowing down; Airflow to face                                                                                | 1   | 2   | n/a | n/a | n/a | n/a | n/a                                                                                        |
| Plan 45 | Self-Developed (St Vincent's Public Hospital, Melbourne) | 5 | Stopping or slowing down; Airflow to face; Physical positioning; Relaxation/distraction techniques; Breathing techniques | 1   | 4   | 3   | 2   | 5   | n/a | n/a                                                                                        |
| Plan 46 | Self-Developed (South Eastern Sydney LHD)                | 4 | Physical positioning; Airflow to face; Relaxation/distraction technique; Breathing techniques                            | n/a | 4   | 2   | 1   | 3   | n/a | n/a                                                                                        |
| Plan 47 | Nelson Tasman Hospice                                    | 4 | Airflow to face; Physical positioning; Support from others; Breathing techniques                                         | n/a | n/a | 2   | 1   | 4   | n/a | 3) Support from others - Have someone rub your back if someone present and if it is wanted |
| Plan 48 | Self-Developed (Te Whatu Ora Lakes, NZ)                  | 2 | Relaxation/distraction techniques; Airflow to face                                                                       | n/a | 2   | n/a | n/a | 1   | n/a | n/a                                                                                        |
| Plan 49 | Self-developed (reported as plan-user survey response)   | 3 | Physical positioning; Stopping or slowing down; Breathing techniques                                                     |     |     |     |     |     |     |                                                                                            |
| Plan 50 | Self-developed (reported as plan-user survey response)   | 2 | Breathing techniques; Remaining calm                                                                                     |     |     |     |     |     |     |                                                                                            |

|         |                                                        |   |                                                                                               |
|---------|--------------------------------------------------------|---|-----------------------------------------------------------------------------------------------|
| Plan 51 | Self-developed (reported as plan-user survey response) | 3 | Physical positioning;<br>Remaining calm;<br>Breathing techniques                              |
| Plan 52 | Self-developed (reported as plan-user survey response) | 2 | Breathing techniques;<br>Remaining calm                                                       |
| Plan 53 | Self-developed (reported as plan-user survey response) | 2 | Airflow to face;<br>Breathing techniques                                                      |
| Plan 54 | Self-developed (reported as plan-user survey response) | 4 | Stopping or slowing down;<br>Physical positioning;<br>Breathing techniques;<br>Remaining calm |
| Plan 55 | Self-developed (reported as plan-user survey response) | 3 | Airflow to face;<br>Physical positioning;<br>Breathing techniques                             |
| Plan 56 | Self-developed (reported as plan-user survey response) | 2 | Breathing techniques;<br>Physical positioning                                                 |
| Plan 57 | Self-developed (reported as plan-user survey response) | 2 | Breathing techniques;<br>Physical positioning                                                 |
| Plan 58 | Self-developed (reported as plan-user survey response) | 2 | Physical positioning;<br>Breathing techniques                                                 |
| Plan 59 | Self-developed (reported as plan-user survey response) | 2 | Breathing techniques;<br>Remaining calm                                                       |

|         |                                                        |   |                                                                                |
|---------|--------------------------------------------------------|---|--------------------------------------------------------------------------------|
| Plan 60 | Self-developed (reported as plan-user survey response) | 3 | Airflow to face;<br>Physical positioning;<br>Relaxation/distraction techniques |
| Plan 61 | Self-developed (reported as plan-user survey response) | 2 | Relaxation/distraction techniques; Airflow to face                             |
| Plan 62 | Self-developed (reported as plan-user survey response) | 2 | Stopping or slowing down; Physical positioning                                 |
| Plan 63 | Self-developed (reported as plan-user survey response) | 2 | Remaining calm;<br>Breathing techniques                                        |
| Plan 64 | Self-developed (reported as plan-user survey response) | 2 | Remaining calm;<br>Breathing techniques                                        |
| Plan 65 | Self-developed (reported as plan-user survey response) | 2 | Breathing techniques;<br>Relaxation/distraction techniques                     |
| Plan 66 | Self-developed (reported as plan-user survey response) | 2 | Breathing techniques;<br>Remaining calm                                        |
| Plan 67 | Self-developed (reported as plan-user survey response) | 2 | Breathing techniques;<br>Remaining calm                                        |
| Plan 68 | Self-developed (reported as plan-user survey response) | 3 | Physical positioning;<br>Breathing techniques;<br>Airflow to face              |

|         |                                                                  |   |                                                                  |  |
|---------|------------------------------------------------------------------|---|------------------------------------------------------------------|--|
| Plan 69 | Self-developed<br>(reported as plan-<br>user survey<br>response) | 3 | Remaining calm;<br>Physical positioning;<br>Breathing techniques |  |
|---------|------------------------------------------------------------------|---|------------------------------------------------------------------|--|

\* Step order in which strategies are indicated could not be inferred by plan-user survey responses, where respondents described their self-developed plan in free-text boxes.

**Table 6. Summary Analysis of Plans – Readability and PEMAT**

| Plan Number                                                                                                                                                                           | Plan                                                              | READABILITY                    |                             |                    |                  |                                                    | PEMAT <sup>b</sup>      |                     |
|---------------------------------------------------------------------------------------------------------------------------------------------------------------------------------------|-------------------------------------------------------------------|--------------------------------|-----------------------------|--------------------|------------------|----------------------------------------------------|-------------------------|---------------------|
|                                                                                                                                                                                       |                                                                   | Readability Grade <sup>a</sup> | Number of pages of Resource | Word Count of Plan | Images/ Graphics | Supplementary information                          | Understandability Score | Actionability Score |
| These NHS (UK) Plans are similar:                                                                                                                                                     |                                                                   |                                |                             |                    |                  |                                                    |                         |                     |
| Plan 1                                                                                                                                                                                | NHS - Non Pharmacological Breathlessness Management, page 21 (UK) | 3.9                            | 32                          | 57                 | no               | Yes (plan embedded within powerpoint presentation) | 13%                     | 17%                 |
| Plan 2                                                                                                                                                                                | NHS Coventry and Warwickshire University Hospitals                | 8.8                            | 6                           | 188                | no               | Yes (plan embedded within info guide)              | 41%                     | 33%                 |
| Plan 3                                                                                                                                                                                | NHS Royal Papworth Hospital                                       | 13                             | 9                           | 13                 | no               | Yes (plan embedded within info guide)              | 25%                     | 17%                 |
| Plan 4                                                                                                                                                                                | NHS West Suffolk                                                  | 9                              | 9                           | 164                | no               | Yes (plan embedded within info guide)              | 41%                     | 17%                 |
| Plan 5                                                                                                                                                                                | NHS St Christopher's Hospice                                      | 6.4                            | 3                           | 23                 | no               | Yes (plan embedded within info guide)              | 63%                     | 50%                 |
| These NHS (UK) plans are based on the Cambridge Breathlessness Intervention Service- more focussed on <b>Breathing</b> [ie. 3 F's in different order/graphical differences]:          |                                                                   |                                |                             |                    |                  |                                                    |                         |                     |
| Plan 6                                                                                                                                                                                | NHS Oxford (breathing)                                            | 8.8                            | 12                          | 16                 | no               | Yes (plan embedded within info guide)              | 65%                     | 100%                |
| Plan 7                                                                                                                                                                                | NHS Cambridge University Hospitals (breathing)                    | 11.5                           | 9                           | 131                | no               | Yes (plan embedded within info guide)              | 82%                     | 100%                |
| Plan 8                                                                                                                                                                                | NHS Highland (breathing)                                          | 11.5                           | 9                           | 131                | no               | Yes (plan embedded within info guide)              | 88%                     | 100%                |
| These NHS (UK) plans are based on the Cambridge Breathlessness Intervention Service- more focussed on <b>Thinking</b> [ie. Thinking + 3 Fs in different order/graphical differences]: |                                                                   |                                |                             |                    |                  |                                                    |                         |                     |
| Plan 9                                                                                                                                                                                | NHS Cambridge University Hospitals (thinking)                     | 7.8                            | 9                           | 114                | no               | Yes (plan embedded within info guide)              | 69%                     | 80%                 |
| Plan 10                                                                                                                                                                               | NHS Highland (thinking)                                           | 7.8                            | 6                           | 114                | no               | Yes (plan embedded within info guide)              | 62%                     | 80%                 |
| Plan 11                                                                                                                                                                               | Cambridge Breathlessness                                          | 5.5                            | 32                          | 57                 | no               | Yes (plan embedded within info guide)              | 87%                     | 100%                |

|                                                                                                          |                                                                                  |     |    |     |     |                                       |     |      |
|----------------------------------------------------------------------------------------------------------|----------------------------------------------------------------------------------|-----|----|-----|-----|---------------------------------------|-----|------|
|                                                                                                          | Intervention Service Toolkit                                                     |     |    |     |     |                                       |     |      |
| Plan 12                                                                                                  | St Catherine's Hospice                                                           | 5.5 | 32 | 57  | no  | no                                    | 67% | 100% |
| These plans are based on the NHS iCope Service (UK) and can be considered the same across all resources: |                                                                                  |     |    |     |     |                                       |     |      |
| Plan 13(a)                                                                                               | NHS Camden and Islington - iCope (Anxiety and Panic)                             | 7.9 | 19 | 115 | no  | Yes (plan embedded within info guide) | 75% | 80%  |
| Plan 13(b)                                                                                               | NHS Camden and Islington - iCope (Physical Activity and Exertion)                | 7.9 | 19 | 115 | no  | Yes (plan embedded within info guide) | 75% | 80%  |
| Plan 13(c)                                                                                               | NHS Camden and Islington - iCope (Relaxation and Breathing)                      | 7.9 | 19 | 115 | no  | Yes (plan embedded within info guide) | 75% | 80%  |
| Plan 13(d)                                                                                               | NHS Camden and Islington - iCope (Managing Breathlessness)                       | 7.9 | 19 | 115 | no  | Yes (plan embedded within info guide) | 75% | 80%  |
| Other Plans:                                                                                             |                                                                                  |     |    |     |     |                                       |     |      |
| Plan 14                                                                                                  | Health Resource Directory (South Western Sydney PHN)                             | 6.7 | 2  | 378 | yes | Yes (info provided alongside plan)    | 47% | 67%  |
| Plan 15                                                                                                  | HammondCare                                                                      | 8.2 | 2  | 306 | yes | Yes (info provided alongside plan)    | 61% | 83%  |
| Plan 16                                                                                                  | Territory Palliative Care Plan (accompanies 'Sick Lungs' Guide)                  | 8.8 | 2  | 278 | yes | Yes (info provided alongside plan)    | 44% | 67%  |
| Plan 17                                                                                                  | Managing Your Breathlessness At Home - Central Coast Local Health District (NSW) | 8.2 | 1  | 51  | no  | Yes (plan embedded within info guide) | 67% | 33%  |
| Plan 18                                                                                                  | Thoracare Subiaco                                                                | 8.5 | 2  | 139 | no  | Yes (info provided alongside plan)    | 39% | 40%  |

|         |                                                             |      |    |     |     |                                             |     |      |
|---------|-------------------------------------------------------------|------|----|-----|-----|---------------------------------------------|-----|------|
| Plan 19 | Asthma & Respiratory Foundation, New Zealand                | 5.2  | 1  | 16  | no  | Yes (info provided alongside plan)          | 65% | 50%  |
| Plan 20 | Cancer Society, New Zealand                                 | 7.8  | 3  | 272 | yes | Yes (info provided alongside plan)          | 29% | 50%  |
| Plan 21 | Leeds Centre for Respiratory Medicine (UK)                  | 4.8  | 2  | 268 | yes | Yes (plan embedded within info guide)       | 44% | 50%  |
| Plan 22 | University of Hull - Bringing Breathlessness into View (UK) | 7.2  | 6  | 92  | no  | Yes (plan embedded within info guide)       | 38% | 33%  |
| Plan 23 | Cancer Council (Aus)                                        | 9    | 78 | 189 | yes | Yes (plan embedded within info guide)       | 81% | 100% |
| Plan 24 | Part of LFA COPD Action Plan                                | 9.2  | 2  | 84  | yes | yes (plan embedded within COPD action plan) | 82% | 80%  |
| Plan 25 | Asthma WA (webpage)                                         | 9.9  | 1  | 132 | no  | Yes (plan embedded within info guide)       | 58% | 50%  |
| Plan 26 | NHS Breathlessness                                          | 9.4  | 9  | 101 | yes | yes (plan embedded within info guide)       | 56% | 100% |
| Plan 27 | Part of Chiesi Air COPD Action Plan                         | 7.9  | 2  | 281 | yes | Yes (plan embedded within COPD action plan) | 81% | 83%  |
| Plan 28 | INSPIRE                                                     | 9.3  | 2  | 220 | no  | no                                          | 71% | 80%  |
| Plan 29 | Auckland Hospital Palliative Care Service (NZ)              | 8.8  | 1  | 109 | no  | no                                          | 73% | 100% |
| Plan 30 | Dover Park Hospice (Singapore)                              | 8.8  | 1  | 105 | yes | no                                          | 88% | 80%  |
| Plan 31 | Part of United Healthcare COPD Action Plan (US)             | 5.5  | 3  | 147 | no  | No (plan embedded within COPD action plan)  | 60% | 50%  |
| Plan 32 | Supporting Breathlessness - Support Person Focussed (UK)    | 10.7 | 2  | 174 | no  | Yes (plan embedded within info guide)       | 77% | 60%  |

|         |                                                          |      |   |     |     |                                    |     |      |
|---------|----------------------------------------------------------|------|---|-----|-----|------------------------------------|-----|------|
| Plan 33 | Caring at Home Plan                                      | 5.7  | 1 | 94  | yes | Yes (info provided alongside plan) | 76% | 40%  |
| Plan 34 | Heart Failure Action Plan for Breathlessness             | 7.3  | 1 | 144 | yes | no                                 | 69% | 60%  |
| Plan 35 | INSPIRED Program                                         | 10.7 | 1 | 315 | no  | no                                 | 64% | 60%  |
| Plan 36 | Breathlessness RELief AT HomE (BREATHE) study (UK)       | 8.5  | 1 | 78  | no  | Yes (separate info guide)          | 50% | 100% |
| Plan 37 | American Thoracic Society (US)                           | 12.1 | 3 | 752 | no  | yes (info provided alongside plan) | 62% | 40%  |
| Plan 38 | The Royal Melbourne Hospital                             | 11   | 1 | 254 | no  | no                                 | 77% | 100% |
| Plan 39 | Northern Territory Health                                | 7.2  | 1 | 77  | yes | Yes (info provided alongside plan) | 88% | 100% |
| Plan 40 | NSW Agency for Clinical Innovation                       | 9.8  | 2 | 178 | yes | no                                 | 87% | 100% |
| Plan 41 | WA Country Health Service                                | 8.1  | 2 | 506 | yes | Yes (info provided alongside plan) | 78% | 67%  |
| Plan 42 | Western District Health Service, Hamilton Victoria       | 8.6  | 2 | 185 | yes | no                                 | 50% | 60%  |
| Plan 43 | Self-Developed Plan (Unknown)                            | 7.2  | 1 | 70  | yes | no                                 | 76% | 60%  |
| Plan 44 | Self-Developed (Royal Perth Hospital)                    | 11.9 | 1 | 82  | no  | no                                 | 64% | 60%  |
| Plan 45 | Self-Developed (St Vincent's Public Hospital, Melbourne) | 11.6 | 1 | 50  | yes | no                                 | 69% | 60%  |
| Plan 46 | Self-Developed (South Eastern Sydney LHD)                | 6.6  | 1 | 92  | yes | no                                 | 72% | 80%  |
| Plan 47 | Nelson Tasman Hospice                                    | 9.7  | 1 | 176 | no  | no                                 | 73% | 60%  |
| Plan 48 | Self-Developed (Te Whatu Ora Lakes, NZ)                  | 7.1  | 1 | 105 | no  | no                                 | 50% | 40%  |

|             |                                              |                                                                                                                                                                                                                      |
|-------------|----------------------------------------------|----------------------------------------------------------------------------------------------------------------------------------------------------------------------------------------------------------------------|
| Plans 49-69 | Self-developed (reported as survey response) | Unable to report on readability and assess using PEMAT: Plans were outlined in free-text boxes (ie. no attachment provided to new resource) - see <b>Table 5</b> for content analysis of only strategies recommended |
|-------------|----------------------------------------------|----------------------------------------------------------------------------------------------------------------------------------------------------------------------------------------------------------------------|

<sup>a</sup> Readability was assessed using the Flesch-Kincaid formula administered through the Sydney Health Literacy Lab SHeLL editor [\[https://www.sydneyhealthliteracylab.org.au/\]](https://www.sydneyhealthliteracylab.org.au/)

<sup>b</sup> The Patient Education Materials Assessment Tool – Printable Materials (PEMAT-P) was used to assess the understandability and actionability of plans [Shoemaker SJ, Wolf MS, Brach C. Development of the Patient Education Materials Assessment Tool (PEMAT): a new measure of understandability and actionability for print and audiovisual patient information. Patient Educ Couns. Sep 2014;96(3):395–403. doi:10.1016/j.pec.2014.05.027] – see **Tables 7-13** for detailed PEMAT analysis

**Table 7. Detailed Summary of PEMAT Analysis<sup>a</sup> – Plans 1 to 8**

| PEMAT Item                            |                                                                                                           | Scoring Guide                                                     |                                                    | These NHS (UK) Plans are similar: |                  |                              |                        |                                                | These NHS (UK) plans are based on the Cambridge Breathlessness Intervention Service- more focussed on Breathing [3 Fs in different order/graphical differences] |        |        |  |
|---------------------------------------|-----------------------------------------------------------------------------------------------------------|-------------------------------------------------------------------|----------------------------------------------------|-----------------------------------|------------------|------------------------------|------------------------|------------------------------------------------|-----------------------------------------------------------------------------------------------------------------------------------------------------------------|--------|--------|--|
|                                       |                                                                                                           |                                                                   |                                                    | Plan 1                            | Plan 2           | Plan 3                       | Plan 4                 | Plan 5                                         | Plan 6                                                                                                                                                          | Plan 7 | Plan 8 |  |
|                                       |                                                                                                           | NHS - Non Pharmacological Breathlessness Management, page 21 (UK) | NHS Coventry and Warwickshire University Hospitals | NHS Royal Papworth Hospital       | NHS West Suffolk | NHS St Christopher's Hospice | NHS Oxford (breathing) | NHS Cambridge University Hospitals (breathing) | NHS Highland (breathing)                                                                                                                                        |        |        |  |
| <b>UNDERSTANDABILITY</b>              |                                                                                                           |                                                                   |                                                    |                                   |                  |                              |                        |                                                |                                                                                                                                                                 |        |        |  |
| <b>Topic: Content</b>                 |                                                                                                           |                                                                   |                                                    |                                   |                  |                              |                        |                                                |                                                                                                                                                                 |        |        |  |
| 1                                     | The material makes its purpose completely evident.                                                        | Disagree=0, Agree=1                                               | 0                                                  | 0                                 | 0                | 1                            | 0                      | 0                                              | 1                                                                                                                                                               | 1      |        |  |
| 2                                     | The material does not include information or content that distracts from its purpose.                     | Disagree=0, Agree=1                                               | 1                                                  | 1                                 | 0                | 1                            | 1                      | 1                                              | 1                                                                                                                                                               | 1      |        |  |
| <b>Topic: Word Choice &amp; Style</b> |                                                                                                           |                                                                   |                                                    |                                   |                  |                              |                        |                                                |                                                                                                                                                                 |        |        |  |
| 3                                     | The material uses common, everyday language.                                                              | Disagree=0, Agree=1                                               | 0                                                  | 1                                 | 1                | 1                            | 1                      | 1                                              | 1                                                                                                                                                               | 1      |        |  |
| 4                                     | Medical terms are used only to familiarize audience with the terms. When used, medical terms are defined. | Disagree=0, Agree=1                                               | 1                                                  | 1                                 | 1                | 1                            | 1                      | 1                                              | 0                                                                                                                                                               | 1      |        |  |
| 5                                     | The material uses the active voice.                                                                       | Disagree=0, Agree=1                                               | 0                                                  | 0                                 | 0                | 0                            | 1                      | 1                                              | 1                                                                                                                                                               | 1      |        |  |
| <b>Topic: Use of Numbers</b>          |                                                                                                           |                                                                   |                                                    |                                   |                  |                              |                        |                                                |                                                                                                                                                                 |        |        |  |
| 6                                     | Numbers appearing in the material are clear and easy to understand.                                       | Disagree=0, Agree=1,                                              | N/A                                                | 1                                 | N/A              | 0                            | N/A                    | N/A                                            | N/A                                                                                                                                                             | N/A    |        |  |

|                                   |                                                                                                                                     |                                              |     |     |     |     |     |   |   |   |
|-----------------------------------|-------------------------------------------------------------------------------------------------------------------------------------|----------------------------------------------|-----|-----|-----|-----|-----|---|---|---|
|                                   | No numbers=N/A                                                                                                                      |                                              |     |     |     |     |     |   |   |   |
| 7                                 | The material does not expect the user to perform calculations.                                                                      | Disagree=0, Agree=1                          | N/A | N/A | N/A | N/A | N/A | 1 | 1 | 1 |
| <b>Topic: Organisation</b>        |                                                                                                                                     |                                              |     |     |     |     |     |   |   |   |
| 8                                 | The material breaks or "chunks" information into short sections.                                                                    | Disagree=0, Agree=1, Very short material=N/A | 0   | 1   | 1   | 1   | 1   | 1 | 1 | 1 |
| 9                                 | The material's sections have informative headers.                                                                                   | Disagree=0, Agree=1, Very short material=N/A | 0   | 0   | 0   | 1   | 1   | 1 | 1 | 1 |
| 10                                | The material presents information in a logical sequence.                                                                            | Disagree=0, Agree=1                          | 0   | 0   | 0   | 0   | 0   | 0 | 1 | 1 |
| 11                                | The material provides a summary.                                                                                                    | Disagree=0, Agree=1, Very short material=N/A | 0   | 0   | 0   | 0   | 0   | 1 | 1 | 1 |
| <b>Topic: Layout &amp; Design</b> |                                                                                                                                     |                                              |     |     |     |     |     |   |   |   |
| 12                                | The material uses visual cues (e.g., arrows, boxes, bullets, bold, larger font, highlighting) to draw attention to key points.      | Disagree=0, Agree=1, Video=N/A               | 0   | 1   | 0   | 0   | 1   | 0 | 1 | 1 |
| <b>Topic: Use of Visual Aids</b>  |                                                                                                                                     |                                              |     |     |     |     |     |   |   |   |
| 15                                | The material uses visual aids whenever they could make content more easily understood (e.g., illustration of healthy portion size). | Disagree=0, Agree=1                          | 0   | 0   | 0   | 0   | 0   | 1 | 1 | 1 |
| 16                                | The material's visual aids reinforce rather than distract from the content.                                                         | Disagree=0, Agree=1, No visual aids=N/A      | 0   | 1   | 0   | 0   | 1   | 0 | 1 | 1 |
| 17                                | The material's visual aids have clear titles or captions.                                                                           | Disagree=0, Agree=1, No visual aids=N/A      | NA  | 0   | 0   | 0   | 1   | 1 | 1 | 1 |

|                                                                                                                           |                                                                                                                      |                                                                       |     |     |     |     |     |     |     |      |
|---------------------------------------------------------------------------------------------------------------------------|----------------------------------------------------------------------------------------------------------------------|-----------------------------------------------------------------------|-----|-----|-----|-----|-----|-----|-----|------|
| 18                                                                                                                        | The material uses illustrations and photographs that are clear and uncluttered.                                      | Disagree=0,<br>Agree=1,<br>No visual aids=N/A                         | NA  | 0   | 1   | 1   | 1   | 1   | 1   | 1    |
| 19                                                                                                                        | The material uses simple tables with short and clear row and column headings.                                        | Disagree=0,<br>Agree=1,<br>No tables=N/A                              | N/A  |
| <b>Total Points:</b>                                                                                                      |                                                                                                                      |                                                                       | 2   | 7   | 4   | 7   | 10  | 11  | 14  | 15   |
| <b>Total Points Possible:</b><br>(number of items on which material was rated, excluding items scored not applicable N/A) |                                                                                                                      |                                                                       | 14  | 15  | 14  | 15  | 14  | 15  | 15  | 15   |
| <b>Understandability Score (%):</b><br>(Total Points / Total Possible Points x 100)                                       |                                                                                                                      |                                                                       | 14% | 47% | 29% | 47% | 71% | 73% | 93% | 100% |
| <b>ACTIONABILITY</b>                                                                                                      |                                                                                                                      |                                                                       |     |     |     |     |     |     |     |      |
| 20                                                                                                                        | The material clearly identifies at least one action the user can take.                                               | Disagree=0,<br>Agree=1                                                | 1   | 1   | 1   | 1   | 1   | 1   | 1   | 1    |
| 21                                                                                                                        | The material addresses the user directly when describing actions.                                                    | Disagree=0,<br>Agree=1                                                | 0   | 0   | 0   | 0   | 1   | 1   | 1   | 1    |
| 22                                                                                                                        | The material breaks down any action into manageable, explicit steps.                                                 | Disagree=0,<br>Agree=1                                                | 0   | 1   | 0   | 0   | 0   | 1   | 1   | 1    |
| 23                                                                                                                        | The material provides a tangible tool (e.g., menu planners, checklists) whenever it could help the user take action. | Disagree=0,<br>Agree=1                                                | 0   | 0   | 0   | 0   | 0   | 1   | 1   | 1    |
| 24                                                                                                                        | The material provides simple instructions or examples of how to perform calculations.                                | Disagree=0,<br>Agree=1,<br>No calculations=NA                         | N/A  |
| 25                                                                                                                        | The material explains how to use the charts, graphs, tables, or diagrams to take actions.                            | Disagree=0,<br>Agree=1,<br>No charts, graphs, tables, or diagrams=N/A | 0   | 0   | 0   | 0   | 1   | N/A | 1   | 1    |
| 26                                                                                                                        | The material uses visual aids whenever they could make it easier to act on the instructions.                         | Disagree=0,<br>Agree=1                                                | 0   | 0   | 0   | 0   | 0   | 1   | 1   | 1    |
| <b>Total Points:</b>                                                                                                      |                                                                                                                      |                                                                       | 1   | 2   | 1   | 1   | 3   | 5   | 6   | 6    |

|                                                                                                                           |     |     |     |     |     |      |      |      |
|---------------------------------------------------------------------------------------------------------------------------|-----|-----|-----|-----|-----|------|------|------|
| <b>Total Points Possible:</b><br>(number of items on which material was rated, excluding items scored not applicable N/A) | 6   | 6   | 6   | 6   | 6   | 5    | 6    | 6    |
| <b>Actionability Score (%):</b><br>(Total Points / Total Possible Points x 100)                                           | 17% | 33% | 17% | 17% | 50% | 100% | 100% | 100% |

<sup>a</sup> The Patient Education Materials Assessment Tool – Printable Materials (PEMAT-P) was used to assess the understandability and actionability of plans [Shoemaker SJ, Wolf MS, Brach C. Development of the Patient Education Materials Assessment Tool (PEMAT): a new measure of understandability and actionability for print and audiovisual patient information. Patient Educ Couns. Sep 2014;96(3):395–403. doi:10.1016/j.pec.2014.05.027]

**Table 8. Detailed Summary of PEMAT Analysis – Plans 9 to 13**

| PEMAT Item                            |                                                                                                           | Scoring Guide                                 |                         | These NHS (UK) plans are based on the Crambridge Breathlessness Intervention Service- more focussed on Thinking [Thinking strategies + 3 Fs in different order/graphical differences] |                        |                                                      |                                                                   | These plans are based on the NHS iCope Service (UK) and can be considered the same across all resources |                                                            |            |            |
|---------------------------------------|-----------------------------------------------------------------------------------------------------------|-----------------------------------------------|-------------------------|---------------------------------------------------------------------------------------------------------------------------------------------------------------------------------------|------------------------|------------------------------------------------------|-------------------------------------------------------------------|---------------------------------------------------------------------------------------------------------|------------------------------------------------------------|------------|------------|
|                                       |                                                                                                           |                                               |                         | Plan 9                                                                                                                                                                                | Plan 10                | Plan 11                                              | Plan 12                                                           | Plan 13(a)                                                                                              | Plan 13(b)                                                 | Plan 13(c) | Plan 13(d) |
|                                       |                                                                                                           | NHS Cambridge University Hospitals (thinking) | NHS Highland (thinking) | Cambridge Breathlessness Intervention Service Toolkit                                                                                                                                 | St Catherine's Hospice | NHS Camden and Islington - iCope (Anxiety and Panic) | NHS Camden and Islington - iCope (Physical Activity and Exertion) | NHS Camden and Islington - iCope (Relaxation and Breathing)                                             | NHS Camden and Islington - iCope (Managing Breathlessness) |            |            |
| <b>UNDERSTANDABILITY</b>              |                                                                                                           |                                               |                         |                                                                                                                                                                                       |                        |                                                      |                                                                   |                                                                                                         |                                                            |            |            |
| <b>Topic: Content</b>                 |                                                                                                           |                                               |                         |                                                                                                                                                                                       |                        |                                                      |                                                                   |                                                                                                         |                                                            |            |            |
| 1                                     | The material makes its purpose completely evident.                                                        | Disagree=0, Agree=1                           | 1                       | 1                                                                                                                                                                                     | 1                      | 1                                                    | 1                                                                 | 1                                                                                                       | 1                                                          | 1          |            |
| 2                                     | The material does not include information or content that distracts from its purpose.                     | Disagree=0, Agree=1                           | 0                       | 0                                                                                                                                                                                     | 1                      | 1                                                    | 1                                                                 | 1                                                                                                       | 1                                                          | 1          |            |
| <b>Topic: Word Choice &amp; Style</b> |                                                                                                           |                                               |                         |                                                                                                                                                                                       |                        |                                                      |                                                                   |                                                                                                         |                                                            |            |            |
| 3                                     | The material uses common, everyday language.                                                              | Disagree=0, Agree=1                           | 1                       | 1                                                                                                                                                                                     | 1                      | 1                                                    | 1                                                                 | 1                                                                                                       | 1                                                          | 1          |            |
| 4                                     | Medical terms are used only to familiarize audience with the terms. When used, medical terms are defined. | Disagree=0, Agree=1                           | 1                       | 1                                                                                                                                                                                     | 1                      | 1                                                    | 1                                                                 | 1                                                                                                       | 1                                                          | 1          |            |
| 5                                     | The material uses the active voice.                                                                       | Disagree=0, Agree=1                           | 1                       | 1                                                                                                                                                                                     | 1                      | 1                                                    | 1                                                                 | 1                                                                                                       | 1                                                          | 1          |            |
| <b>Topic: Use of Numbers</b>          |                                                                                                           |                                               |                         |                                                                                                                                                                                       |                        |                                                      |                                                                   |                                                                                                         |                                                            |            |            |
| 6                                     | Numbers appearing in the material are clear and easy to understand.                                       | Disagree=0, Agree=1, No numbers=N/A           | N/A                     | N/A                                                                                                                                                                                   | N/A                    | N/A                                                  | N/A                                                               | N/A                                                                                                     | N/A                                                        | N/A        |            |
| 7                                     | The material does not expect the user to perform calculations.                                            | Disagree=0, Agree=1                           | N/A                     | N/A                                                                                                                                                                                   | N/A                    | N/A                                                  | N/A                                                               | N/A                                                                                                     | N/A                                                        | N/A        |            |

| <b>Topic: Organisation</b>        |                                                                                                                                     |                                                       |     |     |     |     |     |     |     |     |
|-----------------------------------|-------------------------------------------------------------------------------------------------------------------------------------|-------------------------------------------------------|-----|-----|-----|-----|-----|-----|-----|-----|
| 8                                 | The material breaks or "chunks" information into short sections.                                                                    | Disagree=0,<br>Agree=1,<br>Very short<br>material=N/A | 1   | 0   | 1   | 1   | 1   | 1   | 1   | 1   |
| 9                                 | The material's sections have informative headers.                                                                                   | Disagree=0,<br>Agree=1,<br>Very short<br>material=N/A | 1   | 1   | 1   | 1   | 1   | 1   | 1   | 1   |
| 10                                | The material presents information in a logical sequence.                                                                            | Disagree=0,<br>Agree=1                                | 1   | 1   | 1   | 1   | 1   | 1   | 1   | 1   |
| 11                                | The material provides a summary.                                                                                                    | Disagree=0,<br>Agree=1,<br>Very short<br>material=N/A | N/A |
| <b>Topic: Layout &amp; Design</b> |                                                                                                                                     |                                                       |     |     |     |     |     |     |     |     |
| 12                                | The material uses visual cues (e.g., arrows, boxes, bullets, bold, larger font, highlighting) to draw attention to key points.      | Disagree=0,<br>Agree=1,<br>Video=N/A                  | 1   | 1   | 1   | 0   | 1   | 1   | 1   | 1   |
| <b>Topic: Use of Visual Aids</b>  |                                                                                                                                     |                                                       |     |     |     |     |     |     |     |     |
| 15                                | The material uses visual aids whenever they could make content more easily understood (e.g., illustration of healthy portion size). | Disagree=0,<br>Agree=1                                | 0   | 0   | 1   | 0   | 0   | 0   | 0   | 0   |
| 16                                | The material's visual aids reinforce rather than distract from the content.                                                         | Disagree=0,<br>Agree=1,<br>No visual<br>aids=N/A      | N/A | N/A | 1   | N/A | N/A | N/A | N/A | N/A |
| 17                                | The material's visual aids have clear titles or captions.                                                                           | Disagree=0,<br>Agree=1,<br>No visual<br>aids=N/A      | N/A | N/A | 1   | N/A | N/A | N/A | N/A | N/A |
| 18                                | The material uses illustrations and photographs that are clear and uncluttered.                                                     | Disagree=0,<br>Agree=1,<br>No visual<br>aids=N/A      | N/A | N/A | 1   | N/A | N/A | N/A | N/A | N/A |

|                                                                                                                           |                                                                                                                      |                                                                       |     |     |      |     |     |     |     |     |
|---------------------------------------------------------------------------------------------------------------------------|----------------------------------------------------------------------------------------------------------------------|-----------------------------------------------------------------------|-----|-----|------|-----|-----|-----|-----|-----|
| 19                                                                                                                        | The material uses simple tables with short and clear row and column headings.                                        | Disagree=0,<br>Agree=1,<br>No tables=N/A                              | 1   | 1   | N/A  | N/A | N/A | N/A | N/A | N/A |
| <b>Total Points:</b>                                                                                                      |                                                                                                                      |                                                                       | 9   | 8   | 13   | 8   | 9   | 9   | 9   | 9   |
| <b>Total Points Possible:</b><br>(number of items on which material was rated, excluding items scored not applicable N/A) |                                                                                                                      |                                                                       | 11  | 11  | 13   | 10  | 10  | 10  | 10  | 10  |
| <b>Understandability Score (%):</b><br>(Total Points / Total Possible Points x 100)                                       |                                                                                                                      |                                                                       | 82% | 73% | 100% | 80% | 90% | 90% | 90% | 90% |
| <b>ACTIONABILITY</b>                                                                                                      |                                                                                                                      |                                                                       |     |     |      |     |     |     |     |     |
| 20                                                                                                                        | The material clearly identifies at least one action the user can take.                                               | Disagree=0,<br>Agree=1                                                | 1   | 1   | 1    | 1   | 1   | 1   | 1   | 1   |
| 21                                                                                                                        | The material addresses the user directly when describing actions.                                                    | Disagree=0,<br>Agree=1                                                | 1   | 1   | 1    | 1   | 1   | 1   | 1   | 1   |
| 22                                                                                                                        | The material breaks down any action into manageable, explicit steps.                                                 | Disagree=0,<br>Agree=1                                                | 1   | 1   | 1    | 1   | 1   | 1   | 1   | 1   |
| 23                                                                                                                        | The material provides a tangible tool (e.g., menu planners, checklists) whenever it could help the user take action. | Disagree=0,<br>Agree=1                                                | 1   | 1   | 1    | 1   | 0   | 0   | 0   | 0   |
| 24                                                                                                                        | The material provides simple instructions or examples of how to perform calculations.                                | Disagree=0,<br>Agree=1,<br>No calculations=NA                         | N/A | N/A | N/A  | N/A | N/A | N/A | N/A | N/A |
| 25                                                                                                                        | The material explains how to use the charts, graphs, tables, or diagrams to take actions.                            | Disagree=0,<br>Agree=1,<br>No charts, graphs, tables, or diagrams=N/A | N/A | N/A | 1    | N/A | N/A | N/A | N/A | N/A |
| 26                                                                                                                        | The material uses visual aids whenever they could make it easier to act on the instructions.                         | Disagree=0,<br>Agree=1                                                | 0   | 0   | 1    | 0   | 1   | 1   | 1   | 1   |
| <b>Total Points:</b>                                                                                                      |                                                                                                                      |                                                                       | 4   | 4   | 6    | 4   | 4   | 4   | 4   | 4   |
| <b>Total Points Possible:</b><br>(number of items on which material was rated, excluding items scored not applicable N/A) |                                                                                                                      |                                                                       | 5   | 5   | 6    | 5   | 5   | 5   | 5   | 5   |
| <b>Actionability Score (%):</b>                                                                                           |                                                                                                                      |                                                                       | 80% | 80% | 100% | 80% | 80% | 80% | 80% | 80% |

|                                              |  |  |  |  |  |  |  |  |
|----------------------------------------------|--|--|--|--|--|--|--|--|
| (Total Points / Total Possible Points x 100) |  |  |  |  |  |  |  |  |
|----------------------------------------------|--|--|--|--|--|--|--|--|

<sup>a</sup> The Patient Education Materials Assessment Tool – Printable Materials (PEMAT-P) was used to assess the understandability and actionability of plans [Shoemaker SJ, Wolf MS, Brach C. Development of the Patient Education Materials Assessment Tool (PEMAT): a new measure of understandability and actionability for print and audiovisual patient information. Patient Educ Couns. Sep 2014;96(3):395–403. doi:10.1016/j.pec.2014.05.027]

**Table 9. Detailed Summary of PEMAT Analysis<sup>a</sup> – Plans 14 to 21**

|                                       |                                                                                                           | <b>Plan 14</b>                                       | <b>Plan 15</b> | <b>Plan 16</b>                                                  | <b>Plan 17</b>                                                                   | <b>Plan 18</b>    | <b>Plan 19</b>                               | <b>Plan 20</b>              | <b>Plan 21</b>                             |
|---------------------------------------|-----------------------------------------------------------------------------------------------------------|------------------------------------------------------|----------------|-----------------------------------------------------------------|----------------------------------------------------------------------------------|-------------------|----------------------------------------------|-----------------------------|--------------------------------------------|
|                                       |                                                                                                           | Health Resource Directory (South Western Sydney PHN) | Hammond Care   | Territory Palliative Care Plan (accompanies 'Sick Lungs' Guide) | Managing Your Breathlessness At Home - Central Coast Local Health District (NSW) | Thoracare Subiaco | Asthma & Respiratory Foundation, New Zealand | Cancer Society, New Zealand | Leeds Centre for Respiratory Medicine (UK) |
| <b>PEMAT Item</b>                     | <b>Scoring Guide</b>                                                                                      |                                                      |                |                                                                 |                                                                                  |                   |                                              |                             |                                            |
| <b>UNDERSTANDABILITY</b>              |                                                                                                           |                                                      |                |                                                                 |                                                                                  |                   |                                              |                             |                                            |
| <b>Topic: Content</b>                 |                                                                                                           |                                                      |                |                                                                 |                                                                                  |                   |                                              |                             |                                            |
| 1                                     | The material makes its purpose completely evident.                                                        | Disagree=0, Agree=1                                  | 1              | 0                                                               | 0                                                                                | 1                 | 0                                            | 0                           | 0                                          |
| 2                                     | The material does not include information or content that distracts from its purpose.                     | Disagree=0, Agree=1                                  | 1              | 1                                                               | 1                                                                                | 1                 | 0                                            | 1                           | 0                                          |
| <b>Topic: Word Choice &amp; Style</b> |                                                                                                           |                                                      |                |                                                                 |                                                                                  |                   |                                              |                             |                                            |
| 3                                     | The material uses common, everyday language.                                                              | Disagree=0, Agree=1                                  | 1              | 1                                                               | 1                                                                                | 1                 | 1                                            | 1                           | 1                                          |
| 4                                     | Medical terms are used only to familiarize audience with the terms. When used, medical terms are defined. | Disagree=0, Agree=1                                  | 0              | 1                                                               | 1                                                                                | 1                 | 1                                            | 1                           | 0                                          |
| 5                                     | The material uses the active voice.                                                                       | Disagree=0, Agree=1                                  | 1              | 1                                                               | 1                                                                                | 1                 | 0                                            | 1                           | 0                                          |
| <b>Topic: Use of Numbers</b>          |                                                                                                           |                                                      |                |                                                                 |                                                                                  |                   |                                              |                             |                                            |
| 6                                     | Numbers appearing in the material are clear and easy to understand.                                       | Disagree=0, Agree=1, No numbers=N/A                  | 0              | 1                                                               | 1                                                                                | 1                 | 1                                            | N/A                         | 1                                          |
| 7                                     | The material does not expect the user to perform calculations.                                            | Disagree=0, Agree=1                                  | 1              | 1                                                               | 1                                                                                | 1                 | 1                                            | 1                           | N/A                                        |
| <b>Topic: Organisation</b>            |                                                                                                           |                                                      |                |                                                                 |                                                                                  |                   |                                              |                             |                                            |
| 8                                     | The material breaks or "chunks" information into short sections.                                          | Disagree=0, Agree=1, Very short material=N/A         | 1              | 1                                                               | 1                                                                                | 1                 | 1                                            | 1                           | 0                                          |

|                                   |                                                                                                                                     |                                                       |    |     |     |     |     |     |     |     |
|-----------------------------------|-------------------------------------------------------------------------------------------------------------------------------------|-------------------------------------------------------|----|-----|-----|-----|-----|-----|-----|-----|
| 9                                 | The material's sections have informative headers.                                                                                   | Disagree=0,<br>Agree=1,<br>Very short<br>material=N/A | 1  | 1   | 1   | 1   | 1   | 1   | 0   | 1   |
| 10                                | The material presents information in a logical sequence.                                                                            | Disagree=0,<br>Agree=1                                | 0  | 0   | 0   | 0   | 0   | 0   | 0   | 0   |
| 11                                | The material provides a summary.                                                                                                    | Disagree=0,<br>Agree=1,<br>Very short<br>material=N/A | 0  | 0   | 0   | 1   | 0   | 0   | 0   | 0   |
| <b>Topic: Layout &amp; Design</b> |                                                                                                                                     |                                                       |    |     |     |     |     |     |     |     |
| 12                                | The material uses visual cues (e.g., arrows, boxes, bullets, bold, larger font, highlighting) to draw attention to key points.      | Disagree=0,<br>Agree=1,<br>Video=N/A                  | 0  | 0   | 0   | 1   | 0   | 1   | 0   | 1   |
| <b>Topic: Use of Visual Aids</b>  |                                                                                                                                     |                                                       |    |     |     |     |     |     |     |     |
| 15                                | The material uses visual aids whenever they could make content more easily understood (e.g., illustration of healthy portion size). | Disagree=0,<br>Agree=1                                | 1  | 0   | 0   | 1   | 0   | 0   | 0   | 0   |
| 16                                | The material's visual aids reinforce rather than distract from the content.                                                         | Disagree=0,<br>Agree=1,<br>No visual<br>aids=N/A      | 1  | 1   | 0   | 0   | 0   | 1   | 1   | 0   |
| 17                                | The material's visual aids have clear titles or captions.                                                                           | Disagree=0,<br>Agree=1,<br>No visual<br>aids=N/A      | 0  | 1   | 0   | 0   | 0   | 1   | 0   | 0   |
| 18                                | The material uses illustrations and photographs that are clear and uncluttered.                                                     | Disagree=0,<br>Agree=1,<br>No visual<br>aids=N/A      | 0  | 1   | 0   | 0   | 1   | 1   | 1   | 1   |
| 19                                | The material uses simple tables with short and clear row and column headings.                                                       | Disagree=0,<br>Agree=1,<br>No tables=N/A              | 0  | N/A |
| <b>Total Points:</b>              |                                                                                                                                     |                                                       | 9  | 11  | 8   | 12  | 7   | 11  | 5   | 7   |
| <b>Total Points Possible:</b>     |                                                                                                                                     |                                                       | 17 | 16  | 16  | 16  | 16  | 15  | 15  | 14  |

|                                                                                                                           |                                                                                                                      |                                                                       |     |     |     |     |     |     |     |     |
|---------------------------------------------------------------------------------------------------------------------------|----------------------------------------------------------------------------------------------------------------------|-----------------------------------------------------------------------|-----|-----|-----|-----|-----|-----|-----|-----|
| (number of items on which material was rated, excluding items scored not applicable N/A)                                  |                                                                                                                      |                                                                       |     |     |     |     |     |     |     |     |
| <b>Understandability Score (%):</b><br>(Total Points / Total Possible Points x 100)                                       |                                                                                                                      | 53%                                                                   | 69% | 50% | 75% | 44% | 73% | 33% | 50% |     |
| <b>ACTIONABILITY</b>                                                                                                      |                                                                                                                      |                                                                       |     |     |     |     |     |     |     |     |
| 20                                                                                                                        | The material clearly identifies at least one action the user can take.                                               | Disagree=0,<br>Agree=1                                                | 1   | 1   | 1   | 1   | 1   | 1   | 1   | 1   |
| 21                                                                                                                        | The material addresses the user directly when describing actions.                                                    | Disagree=0,<br>Agree=1                                                | 1   | 1   | 1   | 0   | 0   | 1   | 1   | 1   |
| 22                                                                                                                        | The material breaks down any action into manageable, explicit steps.                                                 | Disagree=0,<br>Agree=1                                                | 1   | 1   | 1   | 1   | 1   | 1   | 1   | 1   |
| 23                                                                                                                        | The material provides a tangible tool (e.g., menu planners, checklists) whenever it could help the user take action. | Disagree=0,<br>Agree=1                                                | 1   | 1   | 0   | 0   | 0   | 0   | 0   | 0   |
| 24                                                                                                                        | The material provides simple instructions or examples of how to perform calculations.                                | Disagree=0,<br>Agree=1,<br>No calculations=NA                         | N/A |
| 25                                                                                                                        | The material explains how to use the charts, graphs, tables, or diagrams to take actions.                            | Disagree=0,<br>Agree=1,<br>No charts, graphs, tables, or diagrams=N/A | 0   | 1   | 1   | 0   | N/A | 0   | 0   | 0   |
| 26                                                                                                                        | The material uses visual aids whenever they could make it easier to act on the instructions.                         | Disagree=0,<br>Agree=1                                                | 0   | 0   | 0   | 0   | 0   | 0   | 0   | 0   |
| <b>Total Points:</b>                                                                                                      |                                                                                                                      |                                                                       | 4   | 5   | 4   | 2   | 2   | 3   | 3   | 3   |
| <b>Total Points Possible:</b><br>(number of items on which material was rated, excluding items scored not applicable N/A) |                                                                                                                      |                                                                       | 6   | 6   | 6   | 6   | 5   | 6   | 6   | 6   |
| <b>Actionability Score (%):</b><br>(Total Points / Total Possible Points x 100)                                           |                                                                                                                      |                                                                       | 67% | 83% | 67% | 33% | 40% | 50% | 50% | 50% |

<sup>a</sup> The Patient Education Materials Assessment Tool – Printable Materials (PEMAT-P) was used to assess the understandability and actionability of plans [Shoemaker SJ, Wolf MS, Brach C. Development of the Patient Education Materials Assessment Tool (PEMAT): a new measure of understandability and actionability for print and audiovisual patient information. Patient Educ Couns. Sep 2014;96(3):395–403. doi:10.1016/j.pec.2014.05.027]

**Table 10. Detailed Summary of PEMAT Analysis<sup>a</sup> – Plans 22 to 29**

|                                       |                                                                                                           | <b>Plan 22</b>                                              | <b>Plan 23</b>       | <b>Plan 24</b>               | <b>Plan 25</b>      | <b>Plan 26</b>     | <b>Plan 27</b>                      | <b>Plan 28</b> | <b>Plan 29</b>                                 |     |
|---------------------------------------|-----------------------------------------------------------------------------------------------------------|-------------------------------------------------------------|----------------------|------------------------------|---------------------|--------------------|-------------------------------------|----------------|------------------------------------------------|-----|
|                                       |                                                                                                           | University of Hull - Bringing Breathlessness into View (UK) | Cancer Council (Aus) | Part of LFA COPD Action Plan | Asthma WA (webpage) | NHS Breathlessness | Part of Chiesi Air COPD Action Plan | INSPIRE        | Auckland Hospital Palliative Care Service (NZ) |     |
| <b>PEMAT Item</b>                     | <b>Scoring Guide</b>                                                                                      |                                                             |                      |                              |                     |                    |                                     |                |                                                |     |
| <b>UNDERSTANDABILITY</b>              |                                                                                                           |                                                             |                      |                              |                     |                    |                                     |                |                                                |     |
| <b>Topic: Content</b>                 |                                                                                                           |                                                             |                      |                              |                     |                    |                                     |                |                                                |     |
| 1                                     | The material makes its purpose completely evident.                                                        | Disagree=0, Agree=1                                         | 0                    | 1                            | 1                   | 1                  | 1                                   | 1              | 1                                              |     |
| 2                                     | The material does not include information or content that distracts from its purpose.                     | Disagree=0, Agree=1                                         | 0                    | 1                            | 1                   | 1                  | 1                                   | 1              | 1                                              |     |
| <b>Topic: Word Choice &amp; Style</b> |                                                                                                           |                                                             |                      |                              |                     |                    |                                     |                |                                                |     |
| 3                                     | The material uses common, everyday language.                                                              | Disagree=0, Agree=1                                         | 1                    | 1                            | 1                   | 1                  | 1                                   | 1              | 1                                              |     |
| 4                                     | Medical terms are used only to familiarize audience with the terms. When used, medical terms are defined. | Disagree=0, Agree=1                                         | N/A                  | 1                            | 1                   | 1                  | 1                                   | 1              | 1                                              |     |
| 5                                     | The material uses the active voice.                                                                       | Disagree=0, Agree=1                                         | 0                    | 1                            | 1                   | 0                  | 1                                   | 1              | 1                                              |     |
| <b>Topic: Use of Numbers</b>          |                                                                                                           |                                                             |                      |                              |                     |                    |                                     |                |                                                |     |
| 6                                     | Numbers appearing in the material are clear and easy to understand.                                       | Disagree=0, Agree=1, No numbers=N/A                         | N/A                  | N/A                          | 0                   | N/A                | N/A                                 | N/A            | 1                                              | N/A |
| 7                                     | The material does not expect the user to perform calculations.                                            | Disagree=0, Agree=1                                         | N/A                  | N/A                          | N/A                 | N/A                | N/A                                 | N/A            | 1                                              | N/A |
| <b>Topic: Organisation</b>            |                                                                                                           |                                                             |                      |                              |                     |                    |                                     |                |                                                |     |
| 8                                     | The material breaks or "chunks" information into short sections.                                          | Disagree=0, Agree=1, Very short material=N/A                | 1                    | 1                            | 1                   | 1                  | 1                                   | 1              | 1                                              |     |
| 9                                     | The material's sections have informative headers.                                                         | Disagree=0, Agree=1,                                        | 1                    | 1                            | 1                   | 1                  | 0                                   | 1              | 1                                              | N/A |

|                                                                                                                           |                                                                                                                                     |                                              |    |     |     |     |     |     |     |
|---------------------------------------------------------------------------------------------------------------------------|-------------------------------------------------------------------------------------------------------------------------------------|----------------------------------------------|----|-----|-----|-----|-----|-----|-----|
|                                                                                                                           | Very short material=N/A                                                                                                             |                                              |    |     |     |     |     |     |     |
| 10                                                                                                                        | The material presents information in a logical sequence.                                                                            | Disagree=0, Agree=1                          | 0  | 1   | 1   | 1   | 1   | 1   | 1   |
| 11                                                                                                                        | The material provides a summary.                                                                                                    | Disagree=0, Agree=1, Very short material=N/A | 0  | 0   | 1   | N/A | 0   | 0   | N/A |
| <b>Topic: Layout &amp; Design</b>                                                                                         |                                                                                                                                     |                                              |    |     |     |     |     |     |     |
| 12                                                                                                                        | The material uses visual cues (e.g., arrows, boxes, bullets, bold, larger font, highlighting) to draw attention to key points.      | Disagree=0, Agree=1, Video=N/A               | 1  | 1   | 1   | 0   | 1   | 1   | 0   |
| <b>Topic: Use of Visual Aids</b>                                                                                          |                                                                                                                                     |                                              |    |     |     |     |     |     |     |
| 15                                                                                                                        | The material uses visual aids whenever they could make content more easily understood (e.g., illustration of healthy portion size). | Disagree=0, Agree=1                          | 1  | 1   | 1   | 0   | 1   | 1   | 0   |
| 16                                                                                                                        | The material's visual aids reinforce rather than distract from the content.                                                         | Disagree=0, Agree=1, No visual aids=N/A      | 0  | 1   | 1   | N/A | 1   | 1   | N/A |
| 17                                                                                                                        | The material's visual aids have clear titles or captions.                                                                           | Disagree=0, Agree=1, No visual aids=N/A      | 0  | 1   | 1   | N/A | 0   | 1   | N/A |
| 18                                                                                                                        | The material uses illustrations and photographs that are clear and uncluttered.                                                     | Disagree=0, Agree=1, No visual aids=N/A      | 0  | 1   | 1   | N/A | 0   | 1   | N/A |
| 19                                                                                                                        | The material uses simple tables with short and clear row and column headings.                                                       | Disagree=0, Agree=1, No tables=N/A           | 1  | N/A | N/A | N/A | N/A | N/A | N/A |
| <b>Total Points:</b>                                                                                                      |                                                                                                                                     |                                              | 6  | 13  | 14  | 7   | 9   | 13  | 10  |
| <b>Total Points Possible:</b><br>(number of items on which material was rated, excluding items scored not applicable N/A) |                                                                                                                                     |                                              | 14 | 14  | 15  | 10  | 14  | 14  | 12  |

| <b>Understandability Score (%):</b><br>(Total Points / Total Possible Points x 100)                                       |                                                                                                                      | 43%                                                                         | 93% | 93%  | 70% | 64% | 93%  | 83% | 89% |
|---------------------------------------------------------------------------------------------------------------------------|----------------------------------------------------------------------------------------------------------------------|-----------------------------------------------------------------------------|-----|------|-----|-----|------|-----|-----|
| <b>ACTIONABILITY</b>                                                                                                      |                                                                                                                      |                                                                             |     |      |     |     |      |     |     |
| 20                                                                                                                        | The material clearly identifies at least one action the user can take.                                               | Disagree=0,<br>Agree=1                                                      | 1   | 1    | 1   | 1   | 1    | 1   | 1   |
| 21                                                                                                                        | The material addresses the user directly when describing actions.                                                    | Disagree=0,<br>Agree=1                                                      | 0   | 1    | 1   | 1   | 1    | 1   | 1   |
| 22                                                                                                                        | The material breaks down any action into manageable, explicit steps.                                                 | Disagree=0,<br>Agree=1                                                      | 0   | 1    | 1   | 0   | 1    | 1   | 1   |
| 23                                                                                                                        | The material provides a tangible tool (e.g., menu planners, checklists) whenever it could help the user take action. | Disagree=0,<br>Agree=1                                                      | 0   | 1    | 1   |     | 1    | 1   | 1   |
| 24                                                                                                                        | The material provides simple instructions or examples of how to perform calculations.                                | Disagree=0,<br>Agree=1,<br>No calculations=NA                               | N/A | N/A  | N/A | N/A | N/A  | N/A | N/A |
| 25                                                                                                                        | The material explains how to use the charts, graphs, tables, or diagrams to take actions.                            | Disagree=0,<br>Agree=1,<br>No charts,<br>graphs, tables,<br>or diagrams=N/A | 1   | N/A  | N/A | N/A | N/A  | 0   | N/A |
| 26                                                                                                                        | The material uses visual aids whenever they could make it easier to act on the instructions.                         | Disagree=0,<br>Agree=1                                                      | 0   | 1    | 1   | N/A | 1    | 1   | 0   |
| <b>Total Points:</b>                                                                                                      |                                                                                                                      |                                                                             | 2   | 5    | 4   | 2   | 5    | 5   | 4   |
| <b>Total Points Possible:</b><br>(number of items on which material was rated, excluding items scored not applicable N/A) |                                                                                                                      |                                                                             | 6   | 5    | 5   | 4   | 5    | 6   | 5   |
| <b>Actionability Score (%):</b><br>(Total Points / Total Possible Points x 100)                                           |                                                                                                                      |                                                                             | 33% | 100% | 80% | 50% | 100% | 83% | 80% |

<sup>a</sup> The Patient Education Materials Assessment Tool – Printable Materials (PEMAT-P) was used to assess the understandability and actionability of plans [Shoemaker SJ, Wolf MS, Brach C. Development of the Patient Education Materials Assessment Tool (PEMAT): a new measure of understandability and actionability for print and audiovisual patient information. Patient Educ Couns. Sep 2014;96(3):395–403. doi:10.1016/j.pec.2014.05.027]

**Table 11. Detailed Summary of PEMAT Analysis<sup>a</sup> – Plans 30 to 37**

|                                       |                                                                                                           | <b>Plan 30</b>                               | <b>Plan 31</b>                                  | <b>Plan 32</b>                                           | <b>Plan 33</b>      | <b>Plan 34</b>      | <b>Plan 35</b>        | <b>Plan 36</b>                                     | <b>Plan 37</b>                 |     |
|---------------------------------------|-----------------------------------------------------------------------------------------------------------|----------------------------------------------|-------------------------------------------------|----------------------------------------------------------|---------------------|---------------------|-----------------------|----------------------------------------------------|--------------------------------|-----|
|                                       |                                                                                                           | Dover Park Hospice (Singapore)               | Part of United Healthcare COPD Action Plan (US) | Supporting Breathlessness - Support Person Focussed (UK) | Caring at Home Plan | Heart Failure Study | INSPIRED Program (UK) | Breathlessness RELIEF AT Home (BREATHE) study (UK) | American Thoracic Society (US) |     |
| <b>PEMAT Item</b>                     | <b>Scoring Guide</b>                                                                                      |                                              |                                                 |                                                          |                     |                     |                       |                                                    |                                |     |
| <b>UNDERSTANDABILITY</b>              |                                                                                                           |                                              |                                                 |                                                          |                     |                     |                       |                                                    |                                |     |
| <b>Topic: Content</b>                 |                                                                                                           |                                              |                                                 |                                                          |                     |                     |                       |                                                    |                                |     |
| 1                                     | The material makes its purpose completely evident.                                                        | Disagree=0, Agree=1                          | 1                                               | 0                                                        | 1                   | 0                   | 1                     | 1                                                  | 0                              | 1   |
| 2                                     | The material does not include information or content that distracts from its purpose.                     | Disagree=0, Agree=1                          | 1                                               | 0                                                        | 1                   | 0                   | 1                     | 1                                                  | 1                              | 1   |
| <b>Topic: Word Choice &amp; Style</b> |                                                                                                           |                                              |                                                 |                                                          |                     |                     |                       |                                                    |                                |     |
| 3                                     | The material uses common, everyday language.                                                              | Disagree=0, Agree=1                          | 1                                               | 1                                                        | 1                   | 1                   | 1                     | 0                                                  | 1                              | 1   |
| 4                                     | Medical terms are used only to familiarize audience with the terms. When used, medical terms are defined. | Disagree=0, Agree=1                          | 1                                               | 1                                                        | 1                   | 1                   | 1                     | 0                                                  | N/A                            | 0   |
| 5                                     | The material uses the active voice.                                                                       | Disagree=0, Agree=1                          | 1                                               | 1                                                        | 1                   | 1                   | 1                     | 1                                                  | 1                              | 1   |
| <b>Topic: Use of Numbers</b>          |                                                                                                           |                                              |                                                 |                                                          |                     |                     |                       |                                                    |                                |     |
| 6                                     | Numbers appearing in the material are clear and easy to understand.                                       | Disagree=0, Agree=1, No numbers=N/A          | 1                                               | 1                                                        | N/A                 | N/A                 | N/A                   | 1                                                  | N/A                            | N/A |
| 7                                     | The material does not expect the user to perform calculations.                                            | Disagree=0, Agree=1                          | 1                                               | 1                                                        | 1                   | 1                   | 1                     | 1                                                  | 1                              | N/A |
| <b>Topic: Organisation</b>            |                                                                                                           |                                              |                                                 |                                                          |                     |                     |                       |                                                    |                                |     |
| 8                                     | The material breaks or "chunks" information into short sections.                                          | Disagree=0, Agree=1, Very short material=N/A | 1                                               | 1                                                        | 1                   | 1                   | 1                     | 1                                                  | 1                              | 1   |

|                                   |                                                                                                                                     |                                                       |     |     |     |     |     |     |     |     |
|-----------------------------------|-------------------------------------------------------------------------------------------------------------------------------------|-------------------------------------------------------|-----|-----|-----|-----|-----|-----|-----|-----|
| 9                                 | The material's sections have informative headers.                                                                                   | Disagree=0,<br>Agree=1,<br>Very short<br>material=N/A | 1   | 1   | 1   | 1   | 1   | 1   | N/A | 1   |
| 10                                | The material presents information in a logical sequence.                                                                            | Disagree=0,<br>Agree=1                                | 1   | 1   | 1   | 1   | 1   | 1   | 0   | 1   |
| 11                                | The material provides a summary.                                                                                                    | Disagree=0,<br>Agree=1,<br>Very short<br>material=N/A | N/A | N/A | N/A | N/A | N/A | N/A | 1   | N/A |
| <b>Topic: Layout &amp; Design</b> |                                                                                                                                     |                                                       |     |     |     |     |     |     |     |     |
| 12                                | The material uses visual cues (e.g., arrows, boxes, bullets, bold, larger font, highlighting) to draw attention to key points.      | Disagree=0,<br>Agree=1,<br>Video=N/A                  | 1   | 0   | 1   | 1   | 1   | 1   | 0   | 0   |
| <b>Topic: Use of Visual Aids</b>  |                                                                                                                                     |                                                       |     |     |     |     |     |     |     |     |
| 15                                | The material uses visual aids whenever they could make content more easily understood (e.g., illustration of healthy portion size). | Disagree=0,<br>Agree=1                                | 1   | 0   | 0   | 1   | 0   | 0   | 0   | 0   |
| 16                                | The material's visual aids reinforce rather than distract from the content.                                                         | Disagree=0,<br>Agree=1,<br>No visual<br>aids=N/A      | 1   | N/A | N/A | 1   | 0   | N/A | N/A | N/A |
| 17                                | The material's visual aids have clear titles or captions.                                                                           | Disagree=0,<br>Agree=1,<br>No visual<br>aids=N/A      | 1   | N/A | N/A | 1   | 0   | N/A | N/A | N/A |
| 18                                | The material uses illustrations and photographs that are clear and uncluttered.                                                     | Disagree=0,<br>Agree=1,<br>No visual<br>aids=N/A      | 1   | N/A | N/A | 1   | 1   | N/A | N/A | N/A |
| 19                                | The material uses simple tables with short and clear row and column headings.                                                       | Disagree=0,<br>Agree=1,<br>No tables=N/A              | N/A | 1   | N/A | 1   | N/A | N/A | N/A | 1   |
| <b>Total Points:</b>              |                                                                                                                                     |                                                       | 15  | 9   | 10  | 13  | 11  | 9   | 6   | 8   |
| <b>Total Points Possible:</b>     |                                                                                                                                     |                                                       | 15  | 13  | 11  | 15  | 14  | 12  | 10  | 11  |

|                                                                                                                           |                                                                                                                      |                                                                       |     |     |     |     |     |     |      |     |
|---------------------------------------------------------------------------------------------------------------------------|----------------------------------------------------------------------------------------------------------------------|-----------------------------------------------------------------------|-----|-----|-----|-----|-----|-----|------|-----|
| (number of items on which material was rated, excluding items scored not applicable N/A)                                  |                                                                                                                      |                                                                       |     |     |     |     |     |     |      |     |
| <b>Understandability Score (%):</b><br>(Total Points / Total Possible Points x 100)                                       |                                                                                                                      | 100%                                                                  | 69% | 91% | 87% | 79% | 75% | 60% | 73%  |     |
| <b>ACTIONABILITY</b>                                                                                                      |                                                                                                                      |                                                                       |     |     |     |     |     |     |      |     |
| 20                                                                                                                        | The material clearly identifies at least one action the user can take.                                               | Disagree=0,<br>Agree=1                                                | 1   | 1   | 1   | 1   | 1   | 1   | 1    | 1   |
| 21                                                                                                                        | The material addresses the user directly when describing actions.                                                    | Disagree=0,<br>Agree=1                                                | 1   | 1   | 1   | 1   | 1   | 1   | 1    | 0   |
| 22                                                                                                                        | The material breaks down any action into manageable, explicit steps.                                                 | Disagree=0,<br>Agree=1                                                | 1   | 1   | 1   | 0   | 1   | 1   | 1    | 0   |
| 23                                                                                                                        | The material provides a tangible tool (e.g., menu planners, checklists) whenever it could help the user take action. | Disagree=0,<br>Agree=1                                                | 0   | 0   | 0   | 0   | 0   | 0   | 1    | 1   |
| 24                                                                                                                        | The material provides simple instructions or examples of how to perform calculations.                                | Disagree=0,<br>Agree=1,<br>No calculations=NA                         | N/A  | N/A |
| 25                                                                                                                        | The material explains how to use the charts, graphs, tables, or diagrams to take actions.                            | Disagree=0,<br>Agree=1,<br>No charts, graphs, tables, or diagrams=N/A | N/A | NA  | N/A | N/A | N/A | N/A | N/A  | N/A |
| 26                                                                                                                        | The material uses visual aids whenever they could make it easier to act on the instructions.                         | Disagree=0,<br>Agree=1                                                | 1   | 0   | 0   | 0   | 0   | 0   | N/A  | 0   |
| <b>Total Points:</b>                                                                                                      |                                                                                                                      |                                                                       | 4   | 3   | 3   | 2   | 3   | 3   | 4    | 2   |
| <b>Total Points Possible:</b><br>(number of items on which material was rated, excluding items scored not applicable N/A) |                                                                                                                      |                                                                       | 5   | 6   | 5   | 5   | 5   | 5   | 4    | 5   |
| <b>Actionability Score (%):</b><br>(Total Points / Total Possible Points x 100)                                           |                                                                                                                      |                                                                       | 80% | 50% | 60% | 40% | 60% | 60% | 100% | 40% |

<sup>a</sup> The Patient Education Materials Assessment Tool – Printable Materials (PEMAT-P) was used to assess the understandability and actionability of plans [Shoemaker SJ, Wolf MS, Brach C. Development of the Patient Education Materials Assessment Tool (PEMAT): a new measure of understandability and actionability for print and audiovisual patient information. Patient Educ Couns. Sep 2014;96(3):395–403. doi:10.1016/j.pec.2014.05.027]

**Table 12. Detailed Summary of PEMAT Analysis<sup>a</sup> – Plans 38 to 45**

|                                       |                                                                                                           | <b>Plan 38</b>                               | <b>Plan 39</b> | <b>Plan 40</b>                     | <b>Plan 41</b>            | <b>Plan 42</b>                                     | <b>Plan 43</b>                | <b>Plan 44</b>                        | <b>Plan 45</b>                                           |     |
|---------------------------------------|-----------------------------------------------------------------------------------------------------------|----------------------------------------------|----------------|------------------------------------|---------------------------|----------------------------------------------------|-------------------------------|---------------------------------------|----------------------------------------------------------|-----|
|                                       |                                                                                                           | The Royal Melbourne Hospital                 | NT Health      | NSW Agency for Clinical Innovation | WA Country Health Service | Western District Health Service, Hamilton Victoria | Self-Developed Plan (Unknown) | Self-Developed (Royal Perth Hospital) | Self-Developed (St Vincent's Public Hospital, Melbourne) |     |
| <b>PEMAT Item</b>                     | <b>Scoring Guide</b>                                                                                      |                                              |                |                                    |                           |                                                    |                               |                                       |                                                          |     |
| <b>UNDERSTANDABILITY</b>              |                                                                                                           |                                              |                |                                    |                           |                                                    |                               |                                       |                                                          |     |
| <b>Topic: Content</b>                 |                                                                                                           |                                              |                |                                    |                           |                                                    |                               |                                       |                                                          |     |
| 1                                     | The material makes its purpose completely evident.                                                        | Disagree=0, Agree=1                          | 1              | 1                                  | 1                         | 1                                                  | 0                             | 0                                     | 1                                                        | 1   |
| 2                                     | The material does not include information or content that distracts from its purpose.                     | Disagree=0, Agree=1                          | 1              | 1                                  | 1                         | 1                                                  | 0                             | 1                                     | 1                                                        | 1   |
| <b>Topic: Word Choice &amp; Style</b> |                                                                                                           |                                              |                |                                    |                           |                                                    |                               |                                       |                                                          |     |
| 3                                     | The material uses common, everyday language.                                                              | Disagree=0, Agree=1                          | 1              | 1                                  | 1                         | 1                                                  | 1                             | 1                                     | 1                                                        | 1   |
| 4                                     | Medical terms are used only to familiarize audience with the terms. When used, medical terms are defined. | Disagree=0, Agree=1                          | 1              | 1                                  | 1                         | 1                                                  | 1                             | 1                                     | 1                                                        | 1   |
| 5                                     | The material uses the active voice.                                                                       | Disagree=0, Agree=1                          | 1              | 1                                  | 1                         | 1                                                  | 1                             | 1                                     | 1                                                        | 1   |
| <b>Topic: Use of Numbers</b>          |                                                                                                           |                                              |                |                                    |                           |                                                    |                               |                                       |                                                          |     |
| 6                                     | Numbers appearing in the material are clear and easy to understand.                                       | Disagree=0, Agree=1, No numbers=N/A          | 1              | 1                                  | N/A                       | 1                                                  | 1                             | 1                                     | 1                                                        | N/A |
| 7                                     | The material does not expect the user to perform calculations.                                            | Disagree=0, Agree=1                          | N/A            | N/A                                | N/A                       | 1                                                  | 1                             | 1                                     | 1                                                        | 1   |
| <b>Topic: Organisation</b>            |                                                                                                           |                                              |                |                                    |                           |                                                    |                               |                                       |                                                          |     |
| 8                                     | The material breaks or "chunks" information into short sections.                                          | Disagree=0, Agree=1, Very short material=N/A | 1              | 1                                  | 1                         | 1                                                  | 1                             | 1                                     | 1                                                        | 0   |

|                                   |                                                                                                                                     |                                                       |     |     |     |     |     |     |     |     |   |
|-----------------------------------|-------------------------------------------------------------------------------------------------------------------------------------|-------------------------------------------------------|-----|-----|-----|-----|-----|-----|-----|-----|---|
| 9                                 | The material's sections have informative headers.                                                                                   | Disagree=0,<br>Agree=1,<br>Very short<br>material=N/A | 1   | 1   | 1   | 1   | 1   | 0   | 0   | 1   |   |
| 10                                | The material presents information in a logical sequence.                                                                            | Disagree=0,<br>Agree=1                                | 1   | 1   | 1   | 1   | 1   | 1   | 1   | 1   |   |
| 11                                | The material provides a summary.                                                                                                    | Disagree=0,<br>Agree=1,<br>Very short<br>material=N/A | N/A |   |
| <b>Topic: Layout &amp; Design</b> |                                                                                                                                     |                                                       |     |     |     |     |     |     |     |     |   |
| 12                                | The material uses visual cues (e.g., arrows, boxes, bullets, bold, larger font, highlighting) to draw attention to key points.      | Disagree=0,<br>Agree=1,<br>Video=N/A                  | 1   | 1   | 1   | 1   | 1   | 1   | 1   | 0   | 0 |
| <b>Topic: Use of Visual Aids</b>  |                                                                                                                                     |                                                       |     |     |     |     |     |     |     |     |   |
| 15                                | The material uses visual aids whenever they could make content more easily understood (e.g., illustration of healthy portion size). | Disagree=0,<br>Agree=1                                | 0   | 1   | 1   | 1   | 0   | 1   | 0   | 1   |   |
| 16                                | The material's visual aids reinforce rather than distract from the content.                                                         | Disagree=0,<br>Agree=1,<br>No visual<br>aids=N/A      | N/A | 1   | 1   | 1   | 0   | 1   | N/A | 1   |   |
| 17                                | The material's visual aids have clear titles or captions.                                                                           | Disagree=0,<br>Agree=1,<br>No visual<br>aids=N/A      | N/A | 1   | 1   | 0   | 0   | 1   | N/A | 0   |   |
| 18                                | The material uses illustrations and photographs that are clear and uncluttered.                                                     | Disagree=0,<br>Agree=1,<br>No visual<br>aids=N/A      | N/A | 1   | 1   | 1   | 0   | 1   | N/A | 1   |   |
| 19                                | The material uses simple tables with short and clear row and column headings.                                                       | Disagree=0,<br>Agree=1,<br>No tables=N/A              | N/A | N/A | N/A | NA  | NA  | N/A | N/A | N/A |   |
| <b>Total Points:</b>              |                                                                                                                                     |                                                       | 10  | 14  | 13  | 14  | 9   | 13  | 9   | 11  |   |
| <b>Total Points Possible:</b>     |                                                                                                                                     |                                                       | 11  | 14  | 13  | 16  | 16  | 15  | 12  | 14  |   |

|                                                                                                                           |                                                                                                                      |                                                                       |      |      |      |     |     |     |     |     |
|---------------------------------------------------------------------------------------------------------------------------|----------------------------------------------------------------------------------------------------------------------|-----------------------------------------------------------------------|------|------|------|-----|-----|-----|-----|-----|
| (number of items on which material was rated, excluding items scored not applicable N/A)                                  |                                                                                                                      |                                                                       |      |      |      |     |     |     |     |     |
| <b>Understandability Score (%):</b><br>(Total Points / Total Possible Points x 100)                                       |                                                                                                                      | 91%                                                                   | 100% | 100% | 88%  | 56% | 87% | 75% | 79% |     |
| <b>ACTIONABILITY</b>                                                                                                      |                                                                                                                      |                                                                       |      |      |      |     |     |     |     |     |
| 20                                                                                                                        | The material clearly identifies at least one action the user can take.                                               | Disagree=0,<br>Agree=1                                                | 1    | 1    | 1    | 1   | 1   | 1   | 1   | 1   |
| 21                                                                                                                        | The material addresses the user directly when describing actions.                                                    | Disagree=0,<br>Agree=1                                                | 1    | 1    | 1    | 1   | 1   | 1   | 1   | 0   |
| 22                                                                                                                        | The material breaks down any action into manageable, explicit steps.                                                 | Disagree=0,<br>Agree=1                                                | 1    | 1    | 1    | 1   | 1   | 1   | 1   | 1   |
| 23                                                                                                                        | The material provides a tangible tool (e.g., menu planners, checklists) whenever it could help the user take action. | Disagree=0,<br>Agree=1                                                | 1    | 1    | 1    | 0   | 0   | 0   | 0   | 0   |
| 24                                                                                                                        | The material provides simple instructions or examples of how to perform calculations.                                | Disagree=0,<br>Agree=1,<br>No calculations=NA                         | N/A  | N/A  | N/A  | N/A | N/A | N/A | N/A | N/A |
| 25                                                                                                                        | The material explains how to use the charts, graphs, tables, or diagrams to take actions.                            | Disagree=0,<br>Agree=1,<br>No charts, graphs, tables, or diagrams=N/A | N/A  | N/A  | N/A  | NA  | N/A | N/A | N/A | N/A |
| 26                                                                                                                        | The material uses visual aids whenever they could make it easier to act on the instructions.                         | Disagree=0,<br>Agree=1                                                | N/A  | 1    | 1    | 1   | 0   | 0   | 0   | 1   |
| <b>Total Points:</b>                                                                                                      |                                                                                                                      |                                                                       | 4    | 5    | 5    | 4   | 3   | 3   | 3   | 3   |
| <b>Total Points Possible:</b><br>(number of items on which material was rated, excluding items scored not applicable N/A) |                                                                                                                      |                                                                       | 4    | 5    | 5    | 6   | 5   | 5   | 5   | 5   |
| <b>Actionability Score (%):</b><br>(Total Points / Total Possible Points x 100)                                           |                                                                                                                      |                                                                       | 100% | 100% | 100% | 67% | 60% | 60% | 60% | 60% |

<sup>a</sup> The Patient Education Materials Assessment Tool – Printable Materials (PEMAT-P) was used to assess the understandability and actionability of plans [Shoemaker SJ, Wolf MS, Brach C. Development of the Patient Education Materials Assessment Tool (PEMAT): a new measure of understandability and actionability for print and audiovisual patient information. Patient Educ Couns. Sep 2014;96(3):395–403. doi:10.1016/j.pec.2014.05.027]

**Table 13. Detailed Summary of PEMAT Analysis<sup>a</sup> – Plans 46 to 48**

|                                       |                                                                                                           | <b>Plan 46</b>                               | <b>Plan 47</b>        | <b>Plan 48</b>                          |   |
|---------------------------------------|-----------------------------------------------------------------------------------------------------------|----------------------------------------------|-----------------------|-----------------------------------------|---|
|                                       |                                                                                                           | Self-Developed (South Eastern Sydney LHD)    | Nelson Tasman Hospice | Self-Developed (Te Whatu Ora Lakes, NZ) |   |
| <b>PEMAT Item</b>                     | <b>Scoring Guide</b>                                                                                      |                                              |                       |                                         |   |
| <b>UNDERSTANDABILITY</b>              |                                                                                                           |                                              |                       |                                         |   |
| <b>Topic: Content</b>                 |                                                                                                           |                                              |                       |                                         |   |
| 1                                     | The material makes its purpose completely evident.                                                        | Disagree=0, Agree=1                          | 1                     | 1                                       | 1 |
| 2                                     | The material does not include information or content that distracts from its purpose.                     | Disagree=0, Agree=1                          | 1                     | 1                                       | 1 |
| <b>Topic: Word Choice &amp; Style</b> |                                                                                                           |                                              |                       |                                         |   |
| 3                                     | The material uses common, everyday language.                                                              | Disagree=0, Agree=1                          | 1                     | 1                                       | 0 |
| 4                                     | Medical terms are used only to familiarize audience with the terms. When used, medical terms are defined. | Disagree=0, Agree=1                          | 1                     | 1                                       | 1 |
| 5                                     | The material uses the active voice.                                                                       | Disagree=0, Agree=1                          | 1                     | 1                                       | 0 |
| <b>Topic: Use of Numbers</b>          |                                                                                                           |                                              |                       |                                         |   |
| 6                                     | Numbers appearing in the material are clear and easy to understand.                                       | Disagree=0, Agree=1, No numbers=N/A          | 1                     | 1                                       | 1 |
| 7                                     | The material does not expect the user to perform calculations.                                            | Disagree=0, Agree=1                          | 1                     | 1                                       | 1 |
| <b>Topic: Organisation</b>            |                                                                                                           |                                              |                       |                                         |   |
| 8                                     | The material breaks or "chunks" information into short sections.                                          | Disagree=0, Agree=1, Very short material=N/A | 1                     | 1                                       | 1 |
| 9                                     | The material's sections have informative headers.                                                         | Disagree=0, Agree=1,                         | 0                     | 1                                       | 0 |

|                                                                                                                                        |                                              |     |     |     |
|----------------------------------------------------------------------------------------------------------------------------------------|----------------------------------------------|-----|-----|-----|
|                                                                                                                                        | Very short material=N/A                      |     |     |     |
| 10 The material presents information in a logical sequence.                                                                            | Disagree=0, Agree=1                          | 1   | 1   | 0   |
| 11 The material provides a summary.                                                                                                    | Disagree=0, Agree=1, Very short material=N/A | NA  | NA  | N/A |
| <b>Topic: Layout &amp; Design</b>                                                                                                      |                                              |     |     |     |
| 12 The material uses visual cues (e.g., arrows, boxes, bullets, bold, larger font, highlighting) to draw attention to key points.      | Disagree=0, Agree=1, Video=N/A               | 1   | 1   | 1   |
| <b>Topic: Use of Visual Aids</b>                                                                                                       |                                              |     |     |     |
| 15 The material uses visual aids whenever they could make content more easily understood (e.g., illustration of healthy portion size). | Disagree=0, Agree=1                          | 1   | 0   | 0   |
| 16 The material's visual aids reinforce rather than distract from the content.                                                         | Disagree=0, Agree=1, No visual aids=N/A      | 1   | N/A | N/A |
| 17 The material's visual aids have clear titles or captions.                                                                           | Disagree=0, Agree=1, No visual aids=N/A      | 0   | N/A | N/A |
| 18 The material uses illustrations and photographs that are clear and uncluttered.                                                     | Disagree=0, Agree=1, No visual aids=N/A      | 1   | N/A | N/A |
| 19 The material uses simple tables with short and clear row and column headings.                                                       | Disagree=0, Agree=1, No tables=N/A           | N/A | N/A | N/A |
| <b>Total Points:</b>                                                                                                                   |                                              | 13  | 11  | 7   |
| <b>Total Points Possible:</b><br>(number of items on which material was rated, excluding items scored not applicable N/A)              |                                              | 16  | 13  | 12  |

| <b>Understandability Score (%):</b><br>(Total Points / Total Possible Points x 100)                                       |                                                                                                                      | 81%                                                                            | 85% | 58% |     |
|---------------------------------------------------------------------------------------------------------------------------|----------------------------------------------------------------------------------------------------------------------|--------------------------------------------------------------------------------|-----|-----|-----|
| <b>ACTIONABILITY</b>                                                                                                      |                                                                                                                      |                                                                                |     |     |     |
| 20                                                                                                                        | The material clearly identifies at least one action the user can take.                                               | Disagree=0,<br>Agree=1                                                         | 1   | 1   | 1   |
| 21                                                                                                                        | The material addresses the user directly when describing actions.                                                    | Disagree=0,<br>Agree=1                                                         | 1   | 1   | 0   |
| 22                                                                                                                        | The material breaks down any action into manageable, explicit steps.                                                 | Disagree=0,<br>Agree=1                                                         | 1   | 1   | 1   |
| 23                                                                                                                        | The material provides a tangible tool (e.g., menu planners, checklists) whenever it could help the user take action. | Disagree=0,<br>Agree=1                                                         | 0   | 0   | 0   |
| 24                                                                                                                        | The material provides simple instructions or examples of how to perform calculations.                                | Disagree=0,<br>Agree=1,<br>No calculations=NA                                  | N/A | N/A | N/A |
| 25                                                                                                                        | The material explains how to use the charts, graphs, tables, or diagrams to take actions.                            | Disagree=0,<br>Agree=1,<br>No charts,<br>graphs, tables,<br>or<br>diagrams=N/A | N/A | N/A | N/A |
| 26                                                                                                                        | The material uses visual aids whenever they could make it easier to act on the instructions.                         | Disagree=0,<br>Agree=1                                                         | 1   | 0   | 0   |
| <b>Total Points:</b>                                                                                                      |                                                                                                                      |                                                                                | 4   | 3   | 2   |
| <b>Total Points Possible:</b><br>(number of items on which material was rated, excluding items scored not applicable N/A) |                                                                                                                      |                                                                                | 5   | 5   | 5   |
| <b>Actionability Score (%):</b><br>(Total Points / Total Possible Points x 100)                                           |                                                                                                                      |                                                                                | 80% | 60% | 40% |

<sup>a</sup> The Patient Education Materials Assessment Tool – Printable Materials (PEMAT-P) was used to assess the understandability and actionability of plans [Shoemaker SJ, Wolf MS, Brach C. Development of the Patient Education Materials Assessment Tool (PEMAT): a new measure of understandability and actionability for print and audiovisual patient information. Patient Educ Couns. Sep 2014;96(3):395–403. doi:10.1016/j.pec.2014.05.027]
